# Supplementary material
Source: PubMed Central journal article supplement (PMC122690)
Supplement: pnas_99_8_4894__2.pdf [file pnas_99_8_4894__2.pdf]

Supporting information for Aoki *et al.* (2002) *Proc. Natl. Acad. Sci. USA* **99** (8), 4894–4899.  
(10.1073/pnas.072635899)

**Table 1. CIF1 for the 3:3 *p,p*-Zn<sub>3</sub>L<sup>4</sup>-trithiocyanuric acid<sup>3-</sup> complex (11) (data no. RGK619, registration number CCDC-174993)**

```
data_General
_audit_creation_date      'Mon Nov 19 17:02:33 2001'
_audit_creation_method    'by teXsan'
_audit_update_record      ?
#-----
# PROCESSING SUMMARY (IUCr Office Use Only)
_journal_date_recd_electronic ?
_journal_date_from_coeditor ?
_journal_date_accepted     ?
_journal_coeditor_code     ?
#-----
# SUBMISSION DETAILS
_publ_contact_author_name  'ENTER NAME'
_publ_contact_author_address
;
  ENTER ADDRESS
;
_publ_contact_author_email  'ENTER EMAIL ADDRESS '
_publ_contact_author_fax    'ENTER FAX NUMBER '
_publ_contact_author_phone  'ENTER PHONE NUMBER '
_publ_contact_letter
;
  ENTER TEXT OF LETTER
;
_publ_requested_journal     test
_publ_requested_category    'CHOOSE FI FM FO CI CM CO or AD'

_publ_requested_coeditor_name ?
#-----
# TITLE AND AUTHOR LIST

_publ_section_title
;
  ENTER SECTION TITLE
;

_publ_section_title_footnote
;
  ENTER FOOTNOTE TO TITLE OF PAPER
;
loop_
```

```

_publ_author_name
_publ_author_footnote
_publ_author_address
' FIRST AUTHORS NAME '
;
FIRST AUTHORS FOOTNOTES
;
;
FIRST AUTHORS ADDRESS
;
_publ_section_synopsis
;
ENTER SYNOPSIS
;
#-----
# TEXT

_publ_section_abstract
;
ENTER ABSTRACT
;

_publ_section_comment
;
ENTER TEXT
;

_publ_section_acknowledgements
;
ENTER ACKNOWLEDGEMENTS
;

_publ_section_references
;
ENTER OTHER REFERENCES

```

Altomare, A., Burla, M.C., Camalli, M., Cascarano, G., Giacovazzo, C., Guagliardi, A., Moliterni, A.G.G., Polidori, G. & Spagna, R. (1999). SIR97. A New Tool for Crystal Structure Determination and Refinement. *J. App. Cryst.*, 32, 115-119.

Higashi, T. (1995). ABSCOR. Empirical Absorption Correction. bases on Fourier Series Approximation. Rigaku Corporation, Tokyo, Japan.

Johnson, C. K. (1976). ORTEP-II. A FORTRAN Thermal-Ellipsoid Plot Program. Report ORNL-5138. Oak Ridge National Laboratory. Tennessee, USA.

MSC & Rigaku. (1999). teXsan. Single Crystal Structure Analysis

Software. Version 1.10. Molecular Structure Corporation,  
Texas, USA and Rigaku Corporation, Tokyo, Japan.

Rigaku (1998). PROCESS-AUTO. Automatic Data Acquisition and Processing  
Package for Imaging Plate Diffractometer. Rigaku Corporation, Tokyo,  
Japan

Sheldrick, G.M. (1997). SHELXS97 and SHELXL97. University of  
Goettingen, Germany.

;

\_publ\_section\_figure\_captions

;

ENTER FIGURE CAPTIONS

;

\_publ\_section\_exptl\_prep

;

ENTER COMPOUND PREPARATION DETAILS

;

\_publ\_section\_exptl\_refinement

;

Crystals deposited from concentrated aqueous solution were covered by  
powdery crystals. They could not be clean up because of their instability  
in air. A number of reflections were overlapped by those of crystallites,  
especially in the range of lower  $2\theta$  angle. After checking the intensities  
of equivalent reflections, the reflections exhibiting a low internal  
consistency were removed. The completeness thus was reduced to approximately  
0.83. Although 48.5 oxygen atoms of nine nitrate ions and 21.5 water molecules  
should be located, only 38.5 atoms involving those of five nitrate ions were found.  
A total of 10 oxygen and 4 nitrogen atoms were missing. The atoms of cyclen  
rings were refined isotropically, of which hydrogen atoms excluding those  
attached to nitrogens were not assigned. The bond lengths of C139-C140,  
C140-N141, and N-O of nitrate ions were restrained. These facts seem to result  
in considerably large R values.

;

#-----  
data\_RGK619raplt\_Hiroshima\_Univ

#-----

# CHEMICAL DATA

\_chemical\_formula\_sum 'C129 H259 N54 O48.50 S9 Zn9 '

\_chemical\_formula\_moiety 'C129 H216 N45 S9 Zn9, 21.5(H2 O), 9(N O3)'

\_chemical\_formula\_weight 4219.76

\_chemical\_melting\_point ?

#-----

# CRYSTAL DATA

\_symmetry\_cell\_setting triclinic

```

_symmetry_space_group_name_H-M 'P -1'
_symmetry_Int_Tables_number 2
loop_
_symmetry_equiv_pos_as_xyz
x,y,z
-x,-y,-z
_cell_length_a 15.465(2)
_cell_length_b 21.438(2)
_cell_length_c 29.380(3)
_cell_angle_alpha 92.417(2)
_cell_angle_beta 94.281(1)
_cell_angle_gamma 95.367(3)
_cell_volume 9659(2)
_cell_formula_units_Z 2
_cell_measurement_reflns_used 13427
_cell_measurement_theta_min 5.0
_cell_measurement_theta_max 22.5
_cell_measurement_temperature 123.2
#-----
_exptl_crystal_description 'block'
_exptl_crystal_colour 'colorless'
_exptl_crystal_size_max 0.300
_exptl_crystal_size_mid 0.200
_exptl_crystal_size_min 0.150
_exptl_crystal_size_rad ?
_exptl_crystal_density_diffn 1.451
_exptl_crystal_density_meas ?
_exptl_crystal_density_method 'not measured'
_exptl_absorpt_coefficient_mu 1.280
_exptl_absorpt_correction_type multi-scan
_exptl_absorpt_process_details 'ABSCOR (Higashi, 1995)'
_exptl_absorpt_correction_T_min 0.702
_exptl_absorpt_correction_T_max 0.825
#-----
# EXPERIMENTAL DATA
_diffn_radiation_type 'Mo K\alpha'
_diffn_radiation_wavelength 0.7107
_diffn_measurement_device_type 'Rigaku RAXIS-RAPID Imaging Plate'
_diffn_measurement_method \w
_diffn_detector_area_resol_mean 10.00
_diffn_reflns_number 50564
_diffn_reflns_av_R_equivalents 0.091
_diffn_reflns_theta_min 5.0
_diffn_reflns_theta_max 25.50
_diffn_measured_fraction_theta_max 0.827
_diffn_reflns_theta_full 25.50
_diffn_measured_fraction_theta_full 0.827
_diffn_reflns_limit_h_min -18
_diffn_reflns_limit_h_max 18
_diffn_reflns_limit_k_min -25

```

```

_diffrn_reflms_limit_k_max    25
_diffrn_reflms_limit_l_min   -35
_diffrn_reflms_limit_l_max    35
#-----
# REFINEMENT DATA
_refine_special_details
;
Refinement of F^2 against all reflections. The weighted R factor (wR) and
goodness of fit (S) are based on F^2, whereas conventional R factors (gt)
are based on F, with F set to zero for negative F^2. The threshold
expression of F^2 > 2σ(F^2) is used only for calculating R factor (gt).
;
_reflms_number_total        29770
_reflms_number_gt           15336
_reflms_threshold_expression >2.0sigma(I)
_refine_ls_structure_factor_coef Fsqd
_refine_ls_R_factor_all      0.2148
_refine_ls_R_factor_gt       0.1401
_refine_ls_wR_factor_ref     0.3326
_refine_ls_hydrogen_treatment noref
_refine_ls_number_reflms     29770
_refine_ls_number_parameters 1369
_refine_ls_goodness_of_fit_ref 1.647
_refine_ls_weighting_scheme  calc
_refine_ls_weighting_details
'w = 1/[s^2(Fo^2) + (0.1000P)^2+0.0000P] where P=(Fo^2+2Fc^2)/3'
_refine_ls_shift/su_max      -0.1760
_refine_ls_extinction_method none
_refine_ls_extinction_coef    ?
_refine_ls_extinction_expression ?
_refine_diff_density_max      2.11
_refine_diff_density_min      -1.10
loop_
_atom_type_symbol
_atom_type_description
_atom_type_scatter_dispersion_real
_atom_type_scatter_dispersion_imag
_atom_type_scatter_source
'C' 'C' 0.003 0.002
;International Tables for Crystallography
(1992, Vol. C, Tables 4.2.6.8 and 6.1.1.4)
;
'H' 'H' 0.000 0.000
;International Tables for Crystallography
(1992, Vol. C, Table 6.1.1.4)
;
'N' 'N' 0.006 0.003
;International Tables for Crystallography
(1992, Vol. C, Tables 4.2.6.8 and 6.1.1.4)
;

```

'O' 'O' 0.011 0.006  
;International Tables for Crystallography  
(1992, Vol. C, Tables 4.2.6.8 and 6.1.1.4)  
;  
'S' 'S' 0.125 0.123  
;International Tables for Crystallography  
(1992, Vol. C, Tables 4.2.6.8 and 6.1.1.4)  
;  
'Zn' 'Zn' 0.284 1.430  
;International Tables for Crystallography  
(1992, Vol. C, Tables 4.2.6.8 and 6.1.1.4)

```
#-----
# ATOMIC COORDINATES AND DISPLACEMENT PARAMETERS
loop_
  _atom_site_label
  _atom_site_type_symbol
  _atom_site_fract_x
  _atom_site_fract_y
  _atom_site_fract_z
  _atom_site_U_iso_or_equiv
  _atom_site_adp_type
  _atom_site_occupancy
  _atom_site_symmetry_multiplicity
  _atom_site_calc_flag
  _atom_site_refinement_flags
  _atom_site_disorder_assembly
  _atom_site_disorder_group
Zn1 Zn 1.0298(1) 0.1687(1) 0.21096(6) 0.0808(5) Uani 1 1 d . . .
Zn2 Zn 0.79538(8) 0.13506(7) 0.57798(5) 0.0565(4) Uani 1 1 d . . .
Zn3 Zn 0.73069(8) 0.13167(7) 0.97353(5) 0.0614(4) Uani 1 1 d . . .
Zn65 Zn 0.8749(1) 0.47180(8) 0.19055(6) 0.0747(5) Uani 1 1 d . . .
Zn66 Zn 0.76184(9) 0.40932(7) 0.56590(5) 0.0637(4) Uani 1 1 d . . .
Zn67 Zn 0.63341(8) 0.44594(7) 0.94628(5) 0.0576(4) Uani 1 1 d . . .
Zn129 Zn 0.58244(8) 0.20776(7) 0.13932(5) 0.0597(4) Uani 1 1 d . . .
Zn130 Zn 0.45948(8) 0.22429(7) 0.52713(5) 0.0568(4) Uani 1 1 d . . .
Zn131 Zn 0.29223(7) 0.18657(6) 0.90544(5) 0.0515(3) Uani 1 1 d . . .
S62 S 1.0198(2) 0.2748(2) 0.2033(2) 0.088(1) Uani 1 1 d . . .
S63 S 0.7706(3) 0.4081(2) 0.1465(1) 0.083(1) Uani 1 1 d . . .
S64 S 0.7121(2) 0.1623(2) 0.1389(1) 0.0667(9) Uani 1 1 d . . .
S126 S 0.8682(2) 0.2679(2) 0.5882(1) 0.0643(8) Uani 1 1 d . . .
S127 S 0.5740(2) 0.1291(2) 0.5439(1) 0.0661(9) Uani 1 1 d . . .
S128 S 0.5829(2) 0.3742(2) 0.5443(1) 0.0598(8) Uani 1 1 d . . .
S190 S 0.7278(2) 0.2357(2) 0.9958(1) 0.0692(9) Uani 1 1 d . . .
S191 S 0.4990(2) 0.3879(1) 0.9402(1) 0.0550(7) Uani 1 1 d . . .
S192 S 0.4093(2) 0.1437(2) 0.9399(1) 0.0576(8) Uani 1 1 d . . .
O1W O 0.452(1) 0.474(1 ) 0.4678(7) 0.088(6) Uiso 0.50 1 d P . .
O2W O 0.9514(8) 0.0432(5) 0.3956(4) 0.100(3) Uiso 1 1 d . . .
```

O3W O 0.2034(8) 0.2063(5) 0.3844(4) 0.100(3) Uiso 1 1 d . . .  
O4W O 0.3679(8) 0.0859(6) 0.3083(4) 0.109(4) Uiso 1 1 d . . .  
O5W O 0.3313(8) 0.2056(6) 0.3178(4) 0.104(3) Uiso 1 1 d . . .  
O6W O 0.1149(8) 0.1109(6) 0.4316(4) 0.109(4) Uiso 1 1 d . . .  
O7W O 0.023(1) 0.2444(7) 0.8204(5) 0.139(5) Uiso 1 1 d . . .  
O8W O 0.375(1) 0.3345(8) 0.3182(5) 0.146(5) Uiso 1 1 d . . .  
O9W O 0.118(1) 0.2025(8) 0.5036(5) 0.143(5) Uiso 1 1 d . . .  
O10W O 0.562(1) 0.475(1) 0.2476(7) 0.183(7) Uiso 1 1 d . . .  
O11W O 0.065(1) 0.320(1) 0.5048(7) 0.183(7) Uiso 1 1 d . . .  
O12W O 0.196(1) 0.312(1) 0.2940(7) 0.184(7) Uiso 1 1 d . . .  
O13W O 0.224(1) 0.406(1) 0.2264(7) 0.191(7) Uiso 1 1 d . . .  
O14W O 0.098(1) 0.2042(9) 0.5955(6) 0.168(6) Uiso 1 1 d . . .  
O15W O 0.279(2) 0.262(1) 0.1368(7) 0.201(8) Uiso 1 1 d . . .  
O16W O 0.155(1) 0.3451(9) 0.1336(7) 0.176(7) Uiso 1 1 d . . .  
O17W O 0.396(1) 0.3981(9) 0.2422(6) 0.173(6) Uiso 1 1 d . . .  
O18W O 0.714(1) 0.006(1) 0.2734(7) 0.189(7) Uiso 1 1 d . . .  
O19W O 0.296(1) 0.009(1) 0.2310(7) 0.178(7) Uiso 1 1 d . . .  
O20W O 0.473(1) 0.423(1) 0.3805(7) 0.184(7) Uiso 1 1 d . . .  
O21W O 0.427(1) 0.014(1) 0.5241(7) 0.187(7) Uiso 1 1 d . . .  
O22W O 0.948(2) 0.296(2) 0.904(1) 0.28(1) Uiso 1 1 d . . .  
O23W O 1.004(2) 0.322(2) 0.695(1) 0.29(1) Uiso 1 1 d . . .  
O24W O 0.397(2) 0.423(2) 0.678(1) 0.30(2) Uiso 1 1 d . . .  
O25W O 0.995(3) 0.195(2) 0.042(1) 0.33(2) Uiso 1 1 d . . .  
O202 O 0.0709(9) 0.3461(7) 0.3474(4) 0.132(4) Uiso 1 1 d D . .  
O203 O 0.1325(4) 0.3189(6) 0.4132(4) 0.119(4) Uiso 1 1 d D . .  
O204 O 0.0464(4) 0.3868(7) 0.4146(5) 0.157(6) Uiso 1 1 d D . .  
O206 O 0.1294(3) 0.0918(6) 1.0173(4) 0.106(3) Uiso 1 1 d D . .  
O207 O 0.2083(9) 0.1654(5) 1.0525(6) 0.160(6) Uiso 1 1 d D . .  
O208 O 0.2246(4) 0.0703(5) 1.0732(3) 0.096(3) Uiso 1 1 d D . .  
O210 O 0.7174(2) 0.0001(7) 1.1422(5) 0.130(4) Uiso 1 1 d D . .  
O211 O 0.5948(4) 0.0323(5) 1.1180(3) 0.085(3) Uiso 1 1 d D . .  
O212 O 0.6236(7) 0.010(1) 1.1899(4) 0.197(8) Uiso 1 1 d D . .  
O214 O 0.3210(3) 0.4647(5) 0.8774(3) 0.088(3) Uiso 1 1 d D . .  
O215 O 0.4405(4) 0.4934(7) 0.8428(3) 0.129(4) Uiso 1 1 d D . .  
O216 O 0.4284(5) 0.5227(4) 0.9118(3) 0.080(3) Uiso 1 1 d D . .  
O218 O 0.9606(7) 0.1088(5) 0.8187(4) 0.094(3) Uiso 1 1 d D . .  
O219 O 1.0079(3) 0.0882(9) 0.7536(6) 0.164(6) Uiso 1 1 d D . .  
O220 O 0.8928(4) 0.0333(9) 0.7744(8) 0.212(9) Uiso 1 1 d D . .  
N4 N 0.9776(7) 0.1400(5) 0.2761(4) 0.071(3) Uiso 1 1 d . . .  
N7 N 1.1488(9) 0.1617(6) 0.2478(5) 0.091(4) Uiso 1 1 d . . .  
N10 N 1.0990(9) 0.1309(7) 0.1563(5) 0.095(4) Uiso 1 1 d . . .  
N13 N 0.9270(7) 0.1024(5) 0.1840(4) 0.072(3) Uiso 1 1 d . . .  
N16 N 0.8315(6) 0.1174(5) 0.5062(3) 0.057(2) Uiso 1 1 d . . .  
N19 N 0.7320(7) 0.0445(5) 0.5679(4) 0.065(3) Uiso 1 1 d . . .  
N22 N 0.7830(7) 0.1174(5) 0.6510(3) 0.062(3) Uiso 1 1 d . . .  
N25 N 0.9244(7) 0.1157(5) 0.5948(3) 0.064(3) Uiso 1 1 d . . .  
N28 N 0.7122(6) 0.1177(5) 0.8958(3) 0.056(2) Uiso 1 1 d . . .  
N31 N 0.6176(6) 0.0663(5) 0.9660(3) 0.059(2) Uiso 1 1 d . . .  
N34 N 0.7630(7) 0.0765(5) 1.0320(4) 0.068(3) Uiso 1 1 d . . .  
N37 N 0.8627(7) 0.1202(5) 0.9611(4) 0.067(3) Uiso 1 1 d . . .

N57 N 0.8896(8) 0.3327(7) 0.1734(4) 0.084(3) Uani 1 1 d . . .  
 N59 N 0.7511(6) 0.2850(5) 0.1443(3) 0.059(3) Uani 1 1 d . . .  
 N61 N 0.8648(6) 0.2235(6) 0.1674(3) 0.066(3) Uani 1 1 d . . .  
 N68 N 0.8718(7) 0.4509(5) 0.2632(3) 0.064(3) Uiso 1 1 d . . .  
 N71 N 1.0076(7) 0.4520(5) 0.2036(4) 0.074(3) Uiso 1 1 d . . .  
 N74 N 0.934(1) 0.5413(8) 0.1513(6) 0.125(5) Uiso 1 1 d . . .  
 N77 N 0.8033(8) 0.5454(6) 0.2152(4) 0.083(3) Uiso 1 1 d . . .  
 N80 N 0.7998(6) 0.4251(5) 0.4968(3) 0.058(2) Uiso 1 1 d . . .  
 N83 N 0.8948(7) 0.4212(5) 0.5818(4) 0.069(3) Uiso 1 1 d . . .  
 N86 N 0.7591(7) 0.4271(5) 0.6394(4) 0.073(3) Uiso 1 1 d . . .  
 N89 N 0.7279(7) 0.4998(5) 0.5641(4) 0.068(3) Uiso 1 1 d . . .  
 N92 N 0.6828(8) 0.4305(6) 0.8777(4) 0.082(3) Uiso 1 1 d . . .  
 N95 N 0.6200(9) 0.5341(6) 0.9203(5) 0.091(4) Uiso 1 1 d . . .  
 N98 N 0.6712(8) 0.5019(6) 1.0081(4) 0.083(3) Uiso 1 1 d . . .  
 N101 N 0.7471(9) 0.4061(7) 0.9664(5) 0.093(4) Uiso 1 1 d . . .  
 N121 N 0.7169(5) 0.2078(4) 0.5659(3) 0.046(2) Uani 1 1 d . . .  
 N123 N 0.5886(6) 0.2495(4) 0.5449(3) 0.051(2) Uani 1 1 d . . .  
 N125 N 0.7180(5) 0.3142(4) 0.5617(3) 0.049(2) Uani 1 1 d . . .  
 N132 N 0.5540(8) 0.2348(6) 0.2099(4) 0.087(3) Uiso 1 1 d . . .  
 N135 N 0.571(1) 0.3002(7) 0.1318(5) 0.110(4) Uiso 1 1 d . . .  
 N138 N 0.5033(9) 0.1961(7) 0.0729(5) 0.100(4) Uiso 1 1 d . . .  
 N141 N 0.4882(3) 0.1324(6) 0.1509(4) 0.091(4) Uiso 1 1 d D . .  
 N144 N 0.4590(6) 0.2277(5) 0.4519(3) 0.059(2) Uiso 1 1 d . . .  
 N147 N 0.3678(7) 0.1465(5) 0.5111(3) 0.063(3) Uiso 1 1 d . . .  
 N150 N 0.4048(7) 0.2226(5) 0.5938(3) 0.060(3) Uiso 1 1 d . . .  
 N153 N 0.3857(6) 0.3005(5) 0.5196(3) 0.060(3) Uiso 1 1 d . . .  
 N156 N 0.3114(6) 0.1991(5) 0.8317(3) 0.058(2) Uiso 1 1 d . . .  
 N159 N 0.2021(6) 0.1121(4) 0.8772(3) 0.053(2) Uiso 1 1 d . . .  
 N162 N 0.1882(6) 0.1971(5) 0.9514(3) 0.059(2) Uiso 1 1 d . . .  
 N165 N 0.2897(6) 0.2850(5) 0.9046(3) 0.057(2) Uiso 1 1 d . . .  
 N185 N 0.6090(5) 0.3057(5) 0.9660(3) 0.053(2) Uani 1 1 d . . .  
 N187 N 0.4637(5) 0.2666(5) 0.9404(3) 0.052(2) Uani 1 1 d . . .  
 N189 N 0.5631(5) 0.1966(4) 0.9660(3) 0.053(2) Uani 1 1 d . . .  
 N201 N 0.0862(8) 0.3524(6) 0.3898(4) 0.090(4) Uiso 1 1 d D . .  
 N205 N 0.1882(7) 0.1075(5) 1.0482(3) 0.083(3) Uiso 1 1 d D . .  
 N209 N 0.6411(5) 0.0106(7) 1.1491(4) 0.101(4) Uiso 1 1 d D . .  
 N213 N 0.3956(5) 0.4923(5) 0.8765(3) 0.087(4) Uiso 1 1 d D . .  
 N217 N 0.953(1) 0.0761(7) 0.7821(4) 0.138(6) Uiso 1 1 d D . .  
 C5 C 1.0509(9) 0.1358(7) 0.3061(5) 0.073(4) Uiso 1 1 d . . .  
 C6 C 1.129(1) 0.1155(7) 0.2821(5) 0.078(4) Uiso 1 1 d . . .  
 C8 C 1.214(1) 0.1446(8) 0.2179(6) 0.094(5) Uiso 1 1 d . . .  
 C9 C 1.179(1) 0.108(1) 0.1816(7) 0.116(6) Uiso 1 1 d . . .  
 C11 C 1.034(1) 0.0840(9) 0.1290(6) 0.099(5) Uiso 1 1 d . . .  
 C12 C 0.970(1) 0.0580(7) 0.1554(5) 0.081(4) Uiso 1 1 d . . .  
 C14 C 0.872(1) 0.0786(7) 0.2182(5) 0.077(4) Uiso 1 1 d . . .  
 C15 C 0.930(1) 0.0782(7) 0.2652(5) 0.082(4) Uiso 1 1 d . . .  
 C17 C 0.7768(9) 0.0562(7) 0.4922(5) 0.072(4) Uiso 1 1 d . . .  
 C18 C 0.7617(9) 0.0117(7) 0.5294(5) 0.072(4) Uiso 1 1 d . . .  
 C20 C 0.734(1) 0.0103(9) 0.6118(6) 0.098(5) Uiso 1 1 d . . .  
 C21 C 0.720(1) 0.0619(8) 0.6512(6) 0.095(5) Uiso 1 1 d . . .



C23 C 0.8716(9) 0.1133(7) 0.6711(5) 0.074(4) Uiso 1 1 d ...  
C24 C 0.931(1) 0.0862(8) 0.6377(5) 0.085(4) Uiso 1 1 d ...  
C26 C 0.957(1) 0.0813(7) 0.5551(5) 0.076(4) Uiso 1 1 d ...  
C27 C 0.9243(9) 0.1130(7) 0.5111(5) 0.072(4) Uiso 1 1 d ...  
C29 C 0.6265(8) 0.0767(6) 0.8859(4) 0.060(3) Uiso 1 1 d ...  
C30 C 0.6142(8) 0.0346(6) 0.9252(4) 0.065(3) Uiso 1 1 d ...  
C32 C 0.6176(9) 0.0262(7) 1.0082(5) 0.075(4) Uiso 1 1 d ...  
C33 C 0.709(1) 0.0147(7) 1.0243(5) 0.079(4) Uiso 1 1 d ...  
C35 C 0.862(1) 0.0746(8) 1.0354(5) 0.084(4) Uiso 1 1 d ...  
C36 C 0.8873(9) 0.0681(7) 0.9873(5) 0.072(4) Uiso 1 1 d ...  
C38 C 0.8727(9) 0.1141(6) 0.9133(5) 0.069(3) Uiso 1 1 d ...  
C39 C 0.7870(8) 0.0820(6) 0.8865(4) 0.060(3) Uiso 1 1 d ...  
C40 C 0.9198(8) 0.1901(6) 0.2937(5) 0.064(3) Uani 1 1 d ...  
C41 C 0.8916(8) 0.1811(6) 0.3402(4) 0.060(3) Uani 1 1 d ...  
C42 C 0.9407(7) 0.2081(5) 0.3801(5) 0.056(3) Uani 1 1 d ...  
C43 C 0.9155(7) 0.2056(5) 0.4220(4) 0.054(3) Uani 1 1 d ...  
C44 C 0.8387(8) 0.1709(6) 0.4310(4) 0.060(3) Uani 1 1 d ...  
C45 C 0.7881(6) 0.1407(6) 0.3923(5) 0.058(3) Uani 1 1 d ...  
C46 C 0.8116(8) 0.1443(6) 0.3501(5) 0.062(3) Uani 1 1 d ...  
C47 C 0.8074(7) 0.1687(6) 0.4781(4) 0.059(3) Uani 1 1 d ...  
C48 C 0.7432(7) 0.1709(6) 0.6758(4) 0.056(3) Uani 1 1 d ...  
C49 C 0.7362(7) 0.1695(6) 0.7250(4) 0.059(3) Uani 1 1 d ...  
C50 C 0.8061(8) 0.1926(6) 0.7576(4) 0.055(3) Uani 1 1 d ...  
C51 C 0.7970(8) 0.1926(6) 0.8026(4) 0.058(3) Uani 1 1 d ...  
C52 C 0.7187(7) 0.1712(6) 0.8217(4) 0.057(3) Uani 1 1 d ...  
C53 C 0.6495(8) 0.1518(7) 0.7894(5) 0.068(4) Uani 1 1 d ...  
C54 C 0.6565(9) 0.1483(7) 0.7456(6) 0.077(4) Uani 1 1 d ...  
C55 C 0.7108(8) 0.1743(6) 0.8719(5) 0.063(3) Uani 1 1 d ...  
C56 C 0.9153(8) 0.2763(7) 0.1777(5) 0.065(3) Uani 1 1 d ...  
C58 C 0.8087(9) 0.3368(8) 0.1546(4) 0.072(4) Uani 1 1 d ...  
C60 C 0.7803(8) 0.2302(7) 0.1500(4) 0.064(3) Uani 1 1 d ...  
C69 C 0.958(1) 0.4262(7) 0.2785(5) 0.083(4) Uiso 1 1 d ...  
C70 C 1.032(1) 0.4596(8) 0.2537(6) 0.089(4) Uiso 1 1 d ...  
C72 C 1.064(1) 0.490(1) 0.1748(7) 0.112(6) Uiso 1 1 d ...  
C73 C 1.027(2) 0.559(1) 0.1735(8) 0.134(7) Uiso 1 1 d ...  
C75 C 0.884(1) 0.6045(9) 0.1629(6) 0.103(5) Uiso 1 1 d ...  
C76 C 0.858(1) 0.607(1) 0.2074(7) 0.113(6) Uiso 1 1 d ...  
C78 C 0.786(1) 0.5414(9) 0.2624(6) 0.103(5) Uiso 1 1 d ...  
C79 C 0.861(1) 0.5130(7) 0.2883(5) 0.083(4) Uiso 1 1 d ...  
C81 C 0.894(1) 0.4208(7) 0.4982(5) 0.083(4) Uiso 1 1 d ...  
C82 C 0.9390(9) 0.4489(6) 0.5414(5) 0.068(3) Uiso 1 1 d ...  
C84 C 0.915(1) 0.4551(7) 0.6251(5) 0.082(4) Uiso 1 1 d ...  
C85 C 0.847(1) 0.4313(9) 0.6591(6) 0.101(5) Uiso 1 1 d ...  
C87 C 0.714(1) 0.4868(7) 0.6438(5) 0.081(4) Uiso 1 1 d ...  
C88 C 0.742(1) 0.5333(8) 0.6079(6) 0.095(5) Uiso 1 1 d ...  
C90 C 0.773(1) 0.5315(8) 0.5273(5) 0.086(4) Uiso 1 1 d ...  
C91 C 0.7732(9) 0.4874(7) 0.4861(5) 0.070(3) Uiso 1 1 d ...  
C93 C 0.664(1) 0.5026(9) 0.8556(6) 0.101(5) Uiso 1 1 d ...  
C94 C 0.672(1) 0.553(1) 0.8867(7) 0.111(6) Uiso 1 1 d ...  
C96 C 0.632(1) 0.5829(8) 0.9701(6) 0.094(5) Uiso 1 1 d ...

C97 C 0.693(2) 0.566(1) 0.9993(7) 0.122(6) Uiso 1 1 d . . .  
 C99 C 0.749(2) 0.466(1) 1.0282(8) 0.132(7) Uiso 1 1 d . . .  
 C100 C 0.802(2) 0.448(1) 0.9996(8) 0.133(7) Uiso 1 1 d . . .  
 C102 C 0.784(1) 0.3823(9) 0.9188(6) 0.101(5) Uiso 1 1 d . . .  
 C103 C 0.764(2) 0.421(2) 0.886(1) 0.18(1) Uiso 1 1 d . . .  
 C104 C 0.6315(8) 0.3827(6) 0.8481(4) 0.062(3) Uani 1 1 d . . .  
 C105 C 0.6539(9) 0.3774(7) 0.8012(5) 0.073(4) Uani 1 1 d . . .  
 C106 C 0.5982(8) 0.4067(8) 0.7680(5) 0.075(4) Uani 1 1 d . . .  
 C107 C 0.616(1) 0.4051(8) 0.7220(6) 0.090(5) Uani 1 1 d . . .  
 C108 C 0.6911(9) 0.3763(6) 0.7088(5) 0.070(4) Uani 1 1 d . . .  
 C109 C 0.740(1) 0.3500(7) 0.7392(5) 0.077(4) Uani 1 1 d . . .  
 C110 C 0.722(1) 0.3488(7) 0.7841(6) 0.088(5) Uani 1 1 d . . .  
 C111 C 0.7031(9) 0.3742(7) 0.6576(4) 0.072(4) Uani 1 1 d . . .  
 C112 C 0.7504(9) 0.3748(7) 0.4643(5) 0.081(4) Uani 1 1 d . . .  
 C113 C 0.7640(9) 0.3821(7) 0.4147(5) 0.075(4) Uani 1 1 d . . .  
 C114 C 0.7098(9) 0.4140(8) 0.3864(5) 0.078(4) Uani 1 1 d . . .  
 C115 C 0.7210(9) 0.4198(6) 0.3423(5) 0.071(4) Uani 1 1 d . . .  
 C116 C 0.7885(8) 0.3933(7) 0.3211(5) 0.070(4) Uani 1 1 d . . .  
 C117 C 0.8359(9) 0.3525(8) 0.3477(5) 0.083(4) Uani 1 1 d . . .  
 C118 C 0.8271(9) 0.3507(7) 0.3929(5) 0.073(4) Uani 1 1 d . . .  
 C119 C 0.8008(9) 0.4014(6) 0.2718(4) 0.063(3) Uani 1 1 d . . .  
 C120 C 0.7614(7) 0.2628(5) 0.5710(4) 0.051(3) Uani 1 1 d . . .  
 C122 C 0.6324(7) 0.1998(5) 0.5539(4) 0.044(2) Uani 1 1 d . . .  
 C124 C 0.6348(7) 0.3070(5) 0.5509(3) 0.050(3) Uani 1 1 d . . .  
 C133 C 0.553(1) 0.3098(8) 0.2097(5) 0.085(4) Uiso 1 1 d . . .  
 C134 C 0.516(1) 0.3278(9) 0.1627(6) 0.107(5) Uiso 1 1 d . . .  
 C136 C 0.5341(9) 0.3054(7) 0.0784(5) 0.075(4) Uiso 1 1 d . . .  
 C137 C 0.469(1) 0.254(1) 0.0685(7) 0.117(6) Uiso 1 1 d . . .  
 C139 C 0.4415(5) 0.1388(7) 0.0743(4) 0.074(4) Uiso 1 1 d D . . .  
 C140 C 0.4073(6) 0.1301(9) 0.1203(3) 0.104(5) Uiso 1 1 d D . . .  
 C142 C 0.470(1) 0.1418(8) 0.2048(5) 0.084(4) Uiso 1 1 d . . .  
 C143 C 0.470(1) 0.2045(9) 0.2163(6) 0.102(5) Uiso 1 1 d . . .  
 C145 C 0.404(1) 0.1725(7) 0.4336(5) 0.079(4) Uiso 1 1 d . . .  
 C146 C 0.3321(8) 0.1502(6) 0.4631(4) 0.062(3) Uiso 1 1 d . . .  
 C148 C 0.3026(9) 0.1400(7) 0.5458(5) 0.072(4) Uiso 1 1 d . . .  
 C149 C 0.354(1) 0.1591(7) 0.5937(5) 0.077(4) Uiso 1 1 d . . .  
 C151 C 0.357(1) 0.2744(7) 0.5989(5) 0.084(4) Uiso 1 1 d . . .  
 C152 C 0.3189(9) 0.2953(7) 0.5507(5) 0.073(4) Uiso 1 1 d . . .  
 C154 C 0.3558(9) 0.3069(6) 0.4714(5) 0.070(3) Uiso 1 1 d . . .  
 C155 C 0.424(1) 0.2875(7) 0.4395(5) 0.078(4) Uiso 1 1 d . . .  
 C157 C 0.2579(8) 0.1433(6) 0.8068(4) 0.063(3) Uiso 1 1 d . . .  
 C158 C 0.1783(8) 0.1262(6) 0.8294(4) 0.060(3) Uiso 1 1 d . . .  
 C160 C 0.1279(8) 0.1060(6) 0.9069(4) 0.059(3) Uiso 1 1 d . . .  
 C161 C 0.1088(8) 0.1672(6) 0.9275(4) 0.065(3) Uiso 1 1 d . . .  
 C163 C 0.1851(9) 0.2670(6) 0.9609(4) 0.067(3) Uiso 1 1 d . . .  
 C164 C 0.2052(9) 0.3018(6) 0.9207(5) 0.069(3) Uiso 1 1 d . . .  
 C166 C 0.3110(9) 0.3041(6) 0.8602(4) 0.067(3) Uiso 1 1 d . . .  
 C167 C 0.2776(8) 0.2587(6) 0.8228(4) 0.059(3) Uiso 1 1 d . . .  
 C168 C 0.6222(8) 0.2179(8) 0.2447(5) 0.083(5) Uani 1 1 d . . .  
 C169 C 0.5995(8) 0.2162(8) 0.2952(5) 0.068(4) Uani 1 1 d . . .

C170 C 0.597(1) 0.2751(9) 0.3189(5) 0.091(5) Uani 1 1 d ...  
C171 C 0.5797(9) 0.279(1) 0.3662(5) 0.102(6) Uani 1 1 d ...  
C172 C 0.5612(8) 0.2231(9) 0.3877(5) 0.079(4) Uani 1 1 d ...  
C173 C 0.5669(8) 0.1666(7) 0.3630(5) 0.069(4) Uani 1 1 d ...  
C174 C 0.5818(9) 0.1666(8) 0.3171(5) 0.073(4) Uani 1 1 d ...  
C175 C 0.5517(7) 0.2261(7) 0.4381(4) 0.066(3) Uani 1 1 d ...  
C176 C 0.4764(7) 0.2220(7) 0.6309(4) 0.068(4) Uani 1 1 d ...  
C177 C 0.4539(7) 0.2157(8) 0.6798(5) 0.067(4) Uani 1 1 d ...  
C178 C 0.4584(8) 0.2670(8) 0.7095(5) 0.076(4) Uani 1 1 d ...  
C179 C 0.4425(8) 0.2616(7) 0.7551(5) 0.071(4) Uani 1 1 d ...  
C180 C 0.4244(7) 0.2058(6) 0.7725(4) 0.058(3) Uani 1 1 d ...  
C181 C 0.4197(8) 0.1530(7) 0.7431(4) 0.063(3) Uani 1 1 d ...  
C182 C 0.4361(7) 0.1567(7) 0.6956(5) 0.065(3) Uani 1 1 d ...  
C183 C 0.4059(7) 0.1988(6) 0.8216(4) 0.057(3) Uani 1 1 d ...  
C184 C 0.6259(7) 0.2479(6) 0.9734(4) 0.049(3) Uani 1 1 d ...  
C186 C 0.5257(7) 0.3129(7) 0.9499(4) 0.061(3) Uani 1 1 d ...  
C188 C 0.4861(7) 0.2097(6) 0.9494(4) 0.056(3) Uani 1 1 d ...  
H5 H 0.9499 0.2304 0.2933 0.073 Uiso 1 1 calc ...  
H6 H 0.8681 0.1881 0.2730 0.073 Uiso 1 1 calc ...  
H7 H 0.9975 0.2294 0.3773 0.071 Uiso 1 1 calc ...  
H8 H 0.9500 0.2284 0.4460 0.064 Uiso 1 1 calc ...  
H9 H 0.7341 0.1173 0.3982 0.071 Uiso 1 1 calc ...  
H10 H 0.7770 0.1203 0.3253 0.076 Uiso 1 1 calc ...  
H11 H 0.7460 0.1652 0.4746 0.070 Uiso 1 1 calc ...  
H12 H 0.8293 0.2068 0.4938 0.070 Uiso 1 1 calc ...  
H13 H 0.7787 0.2088 0.6713 0.062 Uiso 1 1 calc ...  
H14 H 0.6863 0.1736 0.6622 0.062 Uiso 1 1 calc ...  
H15 H 0.8590 0.2094 0.7469 0.068 Uiso 1 1 calc ...  
H16 H 0.8445 0.2093 0.8236 0.070 Uiso 1 1 calc ...  
H17 H 0.5948 0.1417 0.7995 0.088 Uiso 1 1 calc ...  
H18 H 0.6081 0.1312 0.7250 0.089 Uiso 1 1 calc ...  
H19 H 0.6572 0.1909 0.8777 0.078 Uiso 1 1 calc ...  
H20 H 0.7577 0.2025 0.8863 0.078 Uiso 1 1 calc ...  
H21 H 0.6363 0.3427 0.8614 0.074 Uiso 1 1 calc ...  
H22 H 0.5717 0.3915 0.8484 0.074 Uiso 1 1 calc ...  
H23 H 0.5533 0.4283 0.7786 0.096 Uiso 1 1 calc ...  
H24 H 0.5771 0.4227 0.6996 0.103 Uiso 1 1 calc ...  
H25 H 0.7930 0.3336 0.7305 0.091 Uiso 1 1 calc ...  
H26 H 0.7556 0.3256 0.8048 0.107 Uiso 1 1 calc ...  
H27 H 0.6479 0.3729 0.6415 0.092 Uiso 1 1 calc ...  
H28 H 0.7294 0.3368 0.6504 0.092 Uiso 1 1 calc ...  
H29 H 0.7626 0.3344 0.4721 0.105 Uiso 1 1 calc ...  
H30 H 0.6873 0.3771 0.4666 0.105 Uiso 1 1 calc ...  
H31 H 0.6642 0.4326 0.3985 0.091 Uiso 1 1 calc ...  
H32 H 0.6826 0.4412 0.3246 0.079 Uiso 1 1 calc ...  
H33 H 0.8746 0.3280 0.3329 0.097 Uiso 1 1 calc ...  
H34 H 0.8651 0.3273 0.4115 0.089 Uiso 1 1 calc ...  
H35 H 0.7475 0.4122 0.2576 0.074 Uiso 1 1 calc ...  
H36 H 0.8141 0.3624 0.2590 0.074 Uiso 1 1 calc ...  
H37 H 0.6381 0.1770 0.2372 0.104 Uiso 1 1 calc ...

H38 H 0.6723 0.2474 0.2442 0.104 Uiso 1 1 calc ...  
H39 H 0.6082 0.3112 0.3039 0.112 Uiso 1 1 calc ...  
H40 H 0.5826 0.3177 0.3827 0.117 Uiso 1 1 calc ...  
H41 H 0.5621 0.1284 0.3778 0.082 Uiso 1 1 calc ...  
H42 H 0.5802 0.1275 0.3001 0.086 Uiso 1 1 calc ...  
H43 H 0.5871 0.2625 0.4513 0.081 Uiso 1 1 calc ...  
H44 H 0.5755 0.1898 0.4500 0.081 Uiso 1 1 calc ...  
H45 H 0.5084 0.1882 0.6237 0.081 Uiso 1 1 calc ...  
H46 H 0.5116 0.2606 0.6301 0.081 Uiso 1 1 calc ...  
H47 H 0.4760 0.3080 0.6991 0.090 Uiso 1 1 calc ...  
H48 H 0.4440 0.2988 0.7748 0.081 Uiso 1 1 calc ...  
H49 H 0.4047 0.1131 0.7544 0.076 Uiso 1 1 calc ...  
H50 H 0.4341 0.1208 0.6764 0.084 Uiso 1 1 calc ...  
H51 H 0.4393 0.2320 0.8391 0.070 Uiso 1 1 calc ...  
H52 H 0.4258 0.1598 0.8300 0.070 Uiso 1 1 calc ...  
H53 H 1.1679 0.1988 0.2628 0.111 Uiso 1 1 calc ...  
H58 H 1.1178 0.1645 0.1364 0.115 Uiso 1 1 calc ...  
H63 H 0.8917 0.1236 0.1637 0.086 Uiso 1 1 calc ...  
H72 H 0.6715 0.0503 0.5603 0.082 Uiso 1 1 calc ...  
H73 H 0.9599 0.1552 0.5990 0.078 Uiso 1 1 calc ...  
H86 H 0.8975 0.1570 0.9727 0.080 Uiso 1 1 calc ...  
H91 H 0.5680 0.0897 0.9658 0.070 Uiso 1 1 calc ...  
H92 H 0.7462 0.0968 1.0588 0.080 Uiso 1 1 calc ...  
H101 H 1.0117 0.4103 0.1954 0.097 Uiso 1 1 calc ...  
H108 H 0.9312 0.5299 0.1180 0.149 Uiso 1 1 calc ...  
H109 H 0.7506 0.5449 0.1977 0.099 Uiso 1 1 calc ...  
H120 H 0.9127 0.3794 0.5847 0.084 Uiso 1 1 calc ...  
H121 H 0.6685 0.4981 0.5555 0.084 Uiso 1 1 calc ...  
H138 H 0.5613 0.5352 0.9084 0.105 Uiso 1 1 calc ...  
H139 H 0.6244 0.4989 1.0271 0.099 Uiso 1 1 calc ...  
H152 H 0.7285 0.3679 0.9820 0.111 Uiso 1 1 calc ...  
H157 H 0.6279 0.3239 0.1382 0.128 Uiso 1 1 calc ...  
H158 H 0.5407 0.1902 0.0503 0.126 Uiso 1 1 calc ...  
H159 H 0.5118 0.0942 0.1471 0.107 Uiso 1 1 calc ...  
H176 H 0.3994 0.1101 0.5124 0.078 Uiso 1 1 calc ...  
H177 H 0.4227 0.3382 0.5294 0.072 Uiso 1 1 calc ...  
H210 H 0.2295 0.0756 0.8776 0.064 Uiso 1 1 calc ...  
H211 H 0.2008 0.1767 0.9794 0.073 Uiso 1 1 calc ...  
H212 H 0.3350 0.3033 0.9266 0.067 Uiso 1 1 calc ...

loop\_

\_atom\_site\_aniso\_label

\_atom\_site\_aniso\_U\_11

\_atom\_site\_aniso\_U\_22

\_atom\_site\_aniso\_U\_33

\_atom\_site\_aniso\_U\_12

\_atom\_site\_aniso\_U\_13

\_atom\_site\_aniso\_U\_23

Zn1 0.0581(9) 0.115(1) 0.072(1) 0.0178(9) 0.0136(8) 0.008(1)

Zn2 0.0384(7) 0.0653(9) 0.0672(9) 0.0110(6) 0.0039(6) 0.0067(7)

Zn3 0.0388(7) 0.071(1) 0.076(1) 0.0069(7) 0.0030(6) 0.0168(8)  
 Zn65 0.0521(9) 0.082(1) 0.087(1) -0.0105(8) -0.0021(8) 0.0209(9)  
 Zn66 0.0472(8) 0.0654(9) 0.076(1) -0.0179(7) 0.0198(7) -0.0060(7)  
 Zn67 0.0378(7) 0.0692(9) 0.0641(9) -0.0085(6) 0.0118(6) 0.0011(7)  
 Zn129 0.0434(7) 0.077(1) 0.0604(9) 0.0058(7) 0.0147(6) 0.0075(7)  
 Zn130 0.0358(7) 0.073(1) 0.0603(9) 0.0001(6) 0.0042(6) -0.0001(7)  
 Zn131 0.0310(6) 0.0595(8) 0.0645(8) 0.0022(6) 0.0061(6) 0.0070(7)  
 S62 0.048(2) 0.104(3) 0.110(3) -0.007(2) 0.004(2) 0.025(2)  
 S63 0.085(3) 0.076(2) 0.083(3) 0.000(2) -0.012(2) 0.009(2)  
 S64 0.047(2) 0.068(2) 0.086(2) 0.004(2) 0.012(2) 0.006(2)  
 S126 0.037(1) 0.071(2) 0.083(2) 0.002(1) -0.003(1) -0.003(2)  
 S127 0.045(2) 0.048(2) 0.102(3) -0.001(1) -0.002(2) 0.002(2)  
 S128 0.042(2) 0.055(2) 0.083(2) 0.006(1) 0.004(1) 0.001(2)  
 S190 0.042(2) 0.073(2) 0.088(2) -0.001(1) -0.009(2) 0.000(2)  
 S191 0.038(1) 0.057(2) 0.071(2) 0.001(1) 0.013(1) 0.004(1)  
 S192 0.038(1) 0.062(2) 0.072(2) -0.002(1) 0.000(1) 0.010(2)  
 N57 0.073(8) 0.09(1) 0.082(8) -0.014(7) 0.015(6) 0.012(7)  
 N59 0.048(6) 0.063(7) 0.066(7) -0.003(5) 0.004(5) 0.001(5)  
 N61 0.040(5) 0.101(9) 0.064(6) 0.019(6) 0.014(5) 0.020(6)  
 N121 0.035(5) 0.052(6) 0.050(5) 0.003(4) 0.004(4) -0.007(4)  
 N123 0.045(5) 0.051(6) 0.056(6) -0.007(5) 0.012(4) -0.007(4)  
 N125 0.033(5) 0.050(6) 0.061(6) -0.009(4) 0.003(4) -0.002(4)  
 N185 0.023(4) 0.065(7) 0.070(6) -0.011(4) 0.008(4) 0.011(5)  
 N187 0.031(4) 0.054(6) 0.070(6) -0.010(4) 0.010(4) -0.004(5)  
 N189 0.032(5) 0.053(6) 0.072(6) -0.011(4) 0.008(4) -0.006(5)  
 C40 0.057(7) 0.055(7) 0.077(9) -0.002(6) 0.006(6) -0.017(6)  
 C41 0.052(7) 0.062(8) 0.067(8) 0.003(6) 0.015(6) 0.014(6)  
 C42 0.041(6) 0.050(7) 0.074(9) -0.008(5) 0.005(6) -0.001(6)  
 C43 0.036(6) 0.053(7) 0.070(8) -0.002(5) -0.007(6) -0.002(6)  
 C44 0.057(7) 0.062(8) 0.063(8) 0.025(6) -0.002(6) -0.001(6)  
 C45 0.025(5) 0.066(8) 0.083(9) 0.000(5) 0.009(6) 0.009(7)  
 C46 0.047(7) 0.056(7) 0.082(9) 0.008(6) -0.003(6) 0.009(7)  
 C47 0.039(6) 0.070(8) 0.071(8) 0.010(6) 0.015(6) 0.009(6)  
 C48 0.039(6) 0.065(8) 0.065(8) 0.013(5) 0.008(5) 0.011(6)  
 C49 0.040(6) 0.069(8) 0.071(8) 0.007(6) 0.020(6) 0.006(6)  
 C50 0.056(7) 0.053(7) 0.055(7) 0.002(6) 0.008(6) 0.004(6)  
 C51 0.055(7) 0.054(7) 0.066(8) -0.002(6) 0.003(6) 0.018(6)  
 C52 0.038(6) 0.060(7) 0.073(8) -0.004(5) 0.002(6) 0.015(6)  
 C53 0.049(7) 0.081(9) 0.08(1) 0.013(6) 0.026(7) 0.011(7)  
 C54 0.050(7) 0.09(1) 0.09(1) 0.008(7) 0.000(7) 0.000(8)  
 C55 0.047(7) 0.068(8) 0.079(9) 0.013(6) 0.015(6) 0.020(7)  
 C56 0.045(7) 0.061(9) 0.09(1) -0.008(6) 0.007(6) 0.030(7)  
 C58 0.062(8) 0.11(1) 0.047(7) 0.025(8) 0.016(6) 0.006(7)  
 C60 0.048(7) 0.075(9) 0.069(8) 0.011(6) 0.017(6) -0.011(7)  
 C104 0.062(7) 0.062(8) 0.063(8) -0.005(6) 0.021(6) 0.004(6)  
 C105 0.062(8) 0.074(9) 0.08(1) -0.019(7) 0.022(7) -0.015(7)  
 C106 0.049(7) 0.12(1) 0.057(8) -0.014(7) 0.019(6) -0.011(8)  
 C107 0.07(1) 0.10(1) 0.09(1) -0.039(9) 0.004(8) 0.005(9)  
 C108 0.063(8) 0.060(8) 0.09(1) -0.010(7) 0.039(8) -0.013(8)  
 C109 0.10(1) 0.070(9) 0.068(9) 0.010(8) 0.033(8) 0.008(7)

C110 0.09(1) 0.061(9) 0.12(1) 0.000(8) 0.034(9) -0.013(9)  
 C111 0.075(9) 0.076(9) 0.062(8) -0.013(7) 0.011(7) -0.011(7)  
 C112 0.068(9) 0.09(1) 0.09(1) 0.002(8) 0.034(8) -0.001(8)  
 C113 0.064(8) 0.08(1) 0.08(1) 0.008(7) 0.018(7) -0.003(8)  
 C114 0.058(8) 0.10(1) 0.08(1) 0.012(8) 0.011(7) 0.013(8)  
 C115 0.057(8) 0.061(8) 0.10(1) 0.009(6) 0.012(7) 0.005(7)  
 C116 0.051(7) 0.071(9) 0.09(1) 0.010(7) 0.004(7) 0.012(7)  
 C117 0.063(9) 0.10(1) 0.08(1) -0.002(8) 0.028(8) 0.010(9)  
 C118 0.064(8) 0.09(1) 0.069(9) 0.024(8) 0.015(7) 0.006(8)  
 C119 0.073(8) 0.051(7) 0.067(8) 0.012(6) 0.011(6) 0.018(6)  
 C120 0.042(6) 0.053(7) 0.057(7) 0.007(6) -0.002(5) -0.014(6)  
 C122 0.040(6) 0.036(6) 0.054(6) 0.005(5) -0.002(5) 0.001(5)  
 C124 0.048(6) 0.059(7) 0.038(6) -0.006(5) 0.003(5) -0.014(5)  
 C168 0.039(6) 0.15(1) 0.059(8) 0.011(8) -0.013(6) -0.018(8)  
 C169 0.041(7) 0.09(1) 0.068(9) 0.011(7) -0.001(6) -0.012(9)  
 C170 0.08(1) 0.13(1) 0.060(9) -0.01(1) 0.004(7) 0.011(9)  
 C171 0.057(9) 0.19(2) 0.055(9) 0.00(1) 0.017(7) -0.03(1)  
 C172 0.038(7) 0.14(2) 0.060(9) 0.010(8) 0.011(6) 0.02(1)  
 C173 0.049(7) 0.09(1) 0.062(9) 0.009(7) -0.001(6) -0.010(8)  
 C174 0.064(8) 0.10(1) 0.055(8) 0.013(8) 0.004(6) -0.004(8)  
 C175 0.040(6) 0.09(1) 0.068(8) 0.001(6) 0.011(6) -0.001(7)  
 C176 0.034(6) 0.11(1) 0.051(7) -0.012(6) 0.002(5) 0.002(7)  
 C177 0.029(6) 0.10(1) 0.067(8) -0.011(6) 0.006(5) -0.010(8)  
 C178 0.036(6) 0.11(1) 0.08(1) -0.010(7) 0.012(6) 0.011(9)  
 C179 0.051(7) 0.09(1) 0.065(9) -0.024(7) 0.006(6) -0.001(7)  
 C180 0.042(6) 0.065(8) 0.070(8) 0.012(6) 0.003(6) 0.011(7)  
 C181 0.046(7) 0.082(9) 0.059(8) 0.003(6) -0.003(6) 0.002(7)  
 C182 0.026(5) 0.077(9) 0.09(1) -0.004(6) 0.007(6) 0.015(8)  
 C183 0.040(6) 0.069(8) 0.062(8) 0.000(6) 0.010(5) 0.010(6)  
 C184 0.036(6) 0.063(8) 0.046(6) -0.009(5) 0.005(5) -0.002(5)  
 C186 0.045(7) 0.10(1) 0.038(6) 0.012(7) 0.012(5) 0.010(6)  
 C188 0.039(6) 0.074(9) 0.056(7) -0.001(6) 0.009(5) 0.009(6)

```

#-----
_computing_data_collection 'PROCESS-AUTO (Rigaku, 1998)'
_computing_cell_refinement 'PROCESS-AUTO (Rigaku, 1998)'
_computing_data_reduction 'teXsan (MSC & Rigaku, 1999)'
_computing_structure_solution 'SIR97 (Altomare, 1999)'
_computing_structure_refinement 'SHELXL97 (Sheldrick, 1997)'
_computing_publication_material 'teXsan (MSC & Rigaku, 1999)'
_computing_molecular_graphics 'ORTEP (Johnson, 1976)'
#-----
_geom_special_details
;
?
;
loop_
  _geom_bond_atom_site_label_1
  _geom_bond_atom_site_label_2
  _geom_bond_distance
  _geom_bond_site_symmetry_2
  
```

\_geom\_bond\_publ\_flag

Zn1 S62 2.315(5) . ?  
Zn1 N4 2.22(1) . ?  
Zn1 N7 2.09(1) . ?  
Zn1 N10 2.17(1) . ?  
Zn1 N13 2.11(1) . ?  
Zn2 N16 2.25(1) . ?  
Zn2 N19 2.09(1) . ?  
Zn2 N22 2.22(1) . ?  
Zn2 N25 2.10(1) . ?  
Zn2 N121 2.089(9) . ?  
Zn3 S190 2.303(4) . ?  
Zn3 N28 2.284(9) . ?  
Zn3 N31 2.13(1) . ?  
Zn3 N34 2.18(1) . ?  
Zn3 N37 2.13(1) . ?  
Zn65 S63 2.295(4) . ?  
Zn65 N68 2.20(1) . ?  
Zn65 N71 2.15(1) . ?  
Zn65 N74 2.11(2) . ?  
Zn65 N77 2.14(1) . ?  
Zn66 N80 2.19(1) . ?  
Zn66 N83 2.06(1) . ?  
Zn66 N86 2.18(1) . ?  
Zn66 N89 2.06(1) . ?  
Zn66 N125 2.083(9) . ?  
Zn67 S191 2.312(3) . ?  
Zn67 N92 2.23(1) . ?  
Zn67 N95 2.09(1) . ?  
Zn67 N98 2.15(1) . ?  
Zn67 N101 2.08(1) . ?  
Zn129 S64 2.311(3) . ?  
Zn129 N132 2.22(1) . ?  
Zn129 N135 2.03(2) . ?  
Zn129 N138 2.22(1) . ?  
Zn129 N141 2.13(1) . ?  
Zn130 N123 2.043(9) . ?  
Zn130 N144 2.21(1) . ?  
Zn130 N147 2.10(1) . ?  
Zn130 N150 2.19(1) . ?  
Zn130 N153 2.09(1) . ?  
Zn131 S192 2.293(3) . ?  
Zn131 N156 2.23(1) . ?  
Zn131 N159 2.116(9) . ?  
Zn131 N162 2.20(1) . ?  
Zn131 N165 2.12(1) . ?  
S62 C56 1.734(13) . ?  
S63 C58 1.708(16) . ?  
S64 C60 1.721(14) . ?  
S126 C120 1.68(1) . ?

S127 C122 1.69(1) . ?  
S128 C124 1.73(1) . ?  
S190 C184 1.71(1) . ?  
S191 C186 1.73(1) . ?  
S192 C188 1.76(1) . ?  
O202 N201 1.25(1) . ?  
O203 N201 1.25(1) . ?  
O204 N201 1.25(1) . ?  
O206 N205 1.25(2) . ?  
O207 N205 1.25(2) . ?  
O208 N205 1.25(1) . ?  
O210 N209 1.25(2) . ?  
O211 N209 1.25(2) . ?  
O212 N209 1.25(2) . ?  
O214 N213 1.25(2) . ?  
O215 N213 1.25(2) . ?  
O216 N213 1.25(2) . ?  
O218 N217 1.25(2) . ?  
O219 N217 1.25(2) . ?  
O220 N217 1.25(3) . ?  
N4 C5 1.40(2) . ?  
N4 C15 1.47(2) . ?  
N4 C40 1.56(2) . ?  
N7 C8 1.45(2) . ?  
N7 C6 1.47(2) . ?  
N10 C11 1.51(2) . ?  
N10 C9 1.53(2) . ?  
N13 C14 1.44(2) . ?  
N13 C12 1.48(2) . ?  
N16 C27 1.45(2) . ?  
N16 C47 1.46(2) . ?  
N16 C17 1.52(2) . ?  
N19 C18 1.43(2) . ?  
N19 C20 1.51(2) . ?  
N22 C23 1.46(2) . ?  
N22 C21 1.47(2) . ?  
N22 C48 1.53(2) . ?  
N25 C24 1.44(2) . ?  
N25 C26 1.50(2) . ?  
N28 C55 1.43(2) . ?  
N28 C39 1.48(2) . ?  
N28 C29 1.52(2) . ?  
N31 C30 1.35(2) . ?  
N31 C32 1.54(2) . ?  
N34 C33 1.50(2) . ?  
N34 C35 1.53(2) . ?  
N37 C38 1.43(3) . ?  
N37 C36 1.45(2) . ?  
N57 C56 1.32(2) . ?  
N57 C58 1.34(2) . ?



N59 C60 1.31(2) . ?  
N59 C58 1.37(2) . ?  
N61 C56 1.32(2) . ?  
N61 C60 1.39(2) . ?  
N68 C119 1.50(2) . ?  
N68 C79 1.52(2) . ?  
N68 C69 1.52(2) . ?  
N71 C72 1.48(2) . ?  
N71 C70 1.49(2) . ?  
N74 C73 1.53(3) . ?  
N74 C75 1.66(2) . ?  
N77 C78 1.44(2) . ?  
N77 C76 1.53(2) . ?  
N80 C81 1.46(2) . ?  
N80 C91 1.48(2) . ?  
N80 C112 1.52(2) . ?  
N83 C84 1.44(2) . ?  
N83 C82 1.53(2) . ?  
N86 C85 1.42(2) . ?  
N86 C111 1.50(2) . ?  
N86 C87 1.52(2) . ?  
N89 C88 1.44(2) . ?  
N89 C90 1.49(2) . ?  
N92 C103 1.30(3) . ?  
N92 C104 1.45(2) . ?  
N92 C93 1.74(2) . ?  
N95 C94 1.37(2) . ?  
N95 C96 1.75(2) . ?  
N98 C97 1.41(2) . ?  
N98 C99 1.59(3) . ?  
N101 C100 1.46(3) . ?  
N101 C102 1.63(2) . ?  
N121 C120 1.31(1) . ?  
N121 C122 1.32(1) . ?  
N123 C122 1.34(1) . ?  
N123 C124 1.36(1) . ?  
N125 C124 1.30(1) . ?  
N125 C120 1.37(1) . ?  
N132 C143 1.43(2) . ?  
N132 C168 1.49(2) . ?  
N132 C133 1.61(2) . ?  
N135 C134 1.43(2) . ?  
N135 C136 1.64(2) . ?  
N138 C137 1.40(2) . ?  
N138 C139 1.49(2) . ?  
N141 C140 1.48(2) . ?  
N141 C142 1.64(2) . ?  
N144 C145 1.45(2) . ?  
N144 C155 1.48(2) . ?  
N144 C175 1.52(2) . ?

N147 C146 1.49(2) . ?  
N147 C148 1.49(2) . ?  
N150 C151 1.40(2) . ?  
N150 C176 1.50(2) . ?  
N150 C149 1.50(2) . ?  
N153 C152 1.43(2) . ?  
N153 C154 1.47(2) . ?  
N156 C167 1.45(2) . ?  
N156 C157 1.52(2) . ?  
N156 C183 1.51(2) . ?  
N159 C158 1.48(2) . ?  
N159 C160 1.49(2) . ?  
N162 C161 1.45(2) . ?  
N162 C163 1.52(2) . ?  
N165 C166 1.44(2) . ?  
N165 C164 1.49(2) . ?  
N185 C184 1.31(2) . ?  
N185 C186 1.36(1) . ?  
N187 C186 1.32(2) . ?  
N187 C188 1.33(2) . ?  
N189 C188 1.31(1) . ?  
N189 C184 1.40(1) . ?  
C5 C6 1.53(2) . ?  
C8 C9 1.35(2) . ?  
C11 C12 1.39(2) . ?  
C14 C15 1.59(2) . ?  
C17 C18 1.50(2) . ?  
C20 C21 1.61(2) . ?  
C23 C24 1.52(2) . ?  
C26 C27 1.56(2) . ?  
C29 C30 1.51(2) . ?  
C32 C33 1.50(2) . ?  
C35 C36 1.50(2) . ?  
C38 C39 1.57(2) . ?  
C40 C41 1.48(2) . ?  
C41 C42 1.42(2) . ?  
C41 C46 1.46(2) . ?  
C42 C43 1.32(2) . ?  
C43 C44 1.39(2) . ?  
C44 C45 1.43(2) . ?  
C44 C47 1.50(2) . ?  
C45 C46 1.32(2) . ?  
C48 C49 1.46(2) . ?  
C49 C50 1.43(2) . ?  
C49 C54 1.46(2) . ?  
C50 C51 1.34(2) . ?  
C51 C52 1.42(2) . ?  
C52 C53 1.40(2) . ?  
C52 C55 1.49(2) . ?  
C53 C54 1.30(2) . ?

C69 C70 1.54(2) . ?  
C72 C73 1.64(3) . ?  
C75 C76 1.40(2) . ?  
C78 C79 1.53(2) . ?  
C81 C82 1.48(2) . ?  
C84 C85 1.57(2) . ?  
C87 C88 1.54(2) . ?  
C90 C91 1.50(2) . ?  
C93 C94 1.38(2) . ?  
C96 C97 1.31(2) . ?  
C99 C100 1.28(3) . ?  
C102 C103 1.33(3) . ?  
C104 C105 1.45(2) . ?  
C105 C110 1.38(2) . ?  
C105 C106 1.45(2) . ?  
C106 C107 1.40(2) . ?  
C107 C108 1.44(2) . ?  
C108 C109 1.31(2) . ?  
C108 C111 1.53(2) . ?  
C109 C110 1.37(2) . ?  
C112 C113 1.50(2) . ?  
C113 C114 1.38(2) . ?  
C113 C118 1.41(2) . ?  
C114 C115 1.33(2) . ?  
C115 C116 1.41(2) . ?  
C116 C117 1.42(2) . ?  
C116 C119 1.49(2) . ?  
C117 C118 1.35(2) . ?  
C133 C134 1.53(2) . ?  
C136 C137 1.43(2) . ?  
C139 C140 1.50(2) . ?  
C142 C143 1.37(2) . ?  
C145 C146 1.51(2) . ?  
C148 C149 1.58(2) . ?  
C151 C152 1.59(2) . ?  
C154 C155 1.54(2) . ?  
C157 C158 1.46(2) . ?  
C160 C161 1.49(2) . ?  
C163 C164 1.46(2) . ?  
C166 C167 1.47(2) . ?  
C168 C169 1.55(2) . ?  
C169 C174 1.28(2) . ?  
C169 C170 1.42(2) . ?  
C170 C171 1.43(2) . ?  
C171 C172 1.39(3) . ?  
C172 C173 1.40(2) . ?  
C172 C175 1.50(2) . ?  
C173 C174 1.38(2) . ?  
C176 C177 1.51(2) . ?  
C177 C182 1.38(2) . ?

C177 C178 1.37(2) . ?  
C178 C179 1.39(2) . ?  
C179 C180 1.33(2) . ?  
C180 C181 1.39(2) . ?  
C180 C183 1.50(2) . ?  
C181 C182 1.44(2) . ?

#-----

loop\_  
\_geom\_angle\_atom\_site\_label\_1  
\_geom\_angle\_atom\_site\_label\_2  
\_geom\_angle\_atom\_site\_label\_3  
\_geom\_angle  
\_geom\_angle\_site\_symmetry\_1  
\_geom\_angle\_site\_symmetry\_3  
\_geom\_angle\_publ\_flag  
N4 Zn1 S62 109.6(3) . . ?  
N4 Zn1 N7 82.4(5) . . ?  
N4 Zn1 N10 139.7(5) . . ?  
N4 Zn1 N13 81.3(4) . . ?  
N7 Zn1 S62 105.9(4) . . ?  
N7 Zn1 N10 81.5(5) . . ?  
N7 Zn1 N13 133.8(5) . . ?  
N10 Zn1 S62 110.3(4) . . ?  
N10 Zn1 N13 83.8(5) . . ?  
N13 Zn1 S62 120.2(3) . . ?  
N16 Zn2 N19 83.1(4) . . ?  
N16 Zn2 N22 157.4(4) . . ?  
N16 Zn2 N25 82.9(4) . . ?  
N16 Zn2 N121 98.4(3) . . ?  
N19 Zn2 N22 83.3(4) . . ?  
N19 Zn2 N25 101.2(4) . . ?  
N19 Zn2 N121 115.4(4) . . ?  
N22 Zn2 N25 82.2(4) . . ?  
N22 Zn2 N121 103.7(4) . . ?  
N25 Zn2 N121 143.3(4) . . ?  
N28 Zn3 S190 110.7(3) . . ?  
N28 Zn3 N31 79.3(4) . . ?  
N28 Zn3 N34 138.0(4) . . ?  
N28 Zn3 N37 81.9(4) . . ?  
N31 Zn3 S190 123.3(3) . . ?  
N31 Zn3 N34 82.6(4) . . ?  
N31 Zn3 N37 130.6(4) . . ?  
N34 Zn3 S190 110.9(3) . . ?  
N34 Zn3 N37 81.7(4) . . ?  
N37 Zn3 S190 106.1(3) . . ?  
N68 Zn65 S63 110.8(3) . . ?  
N68 Zn65 N71 81.3(4) . . ?  
N68 Zn65 N74 137.7(5) . . ?  
N68 Zn65 N77 78.9(4) . . ?

N71 Zn65 S63 124.5(3) . . ?  
N71 Zn65 N74 81.5(6) . . ?  
N71 Zn65 N77 132.4(5) . . ?  
N74 Zn65 S63 110.8(5) . . ?  
N74 Zn65 N77 84.9(6) . . ?  
N77 Zn65 S63 103.0(4) . . ?  
N80 Zn66 N83 82.7(4) . . ?  
N80 Zn66 N86 157.3(4) . . ?  
N80 Zn66 N89 84.2(4) . . ?  
N80 Zn66 N125 102.3(4) . . ?  
N83 Zn66 N86 82.5(4) . . ?  
N83 Zn66 N89 103.4(4) . . ?  
N83 Zn66 N125 110.1(4) . . ?  
N86 Zn66 N89 82.6(4) . . ?  
N86 Zn66 N125 98.9(4) . . ?  
N89 Zn66 N125 146.4(4) . . ?  
N92 Zn67 S191 103.5(3) . . ?  
N92 Zn67 N95 80.4(5) . . ?  
N92 Zn67 N98 138.2(5) . . ?  
N92 Zn67 N101 81.1(5) . . ?  
N95 Zn67 S191 109.2(4) . . ?  
N95 Zn67 N98 81.9(5) . . ?  
N95 Zn67 N101 128.7(6) . . ?  
N98 Zn67 S191 118.1(4) . . ?  
N98 Zn67 N101 81.0(5) . . ?  
N101 Zn67 S191 121.5(4) . . ?  
N132 Zn129 S64 111.1(3) . . ?  
N132 Zn129 N135 80.8(6) . . ?  
N132 Zn129 N138 133.9(5) . . ?  
N132 Zn129 N141 80.3(5) . . ?  
N135 Zn129 S64 124.6(5) . . ?  
N135 Zn129 N138 83.7(6) . . ?  
N135 Zn129 N141 131.0(5) . . ?  
N138 Zn129 S64 113.5(4) . . ?  
N138 Zn129 N141 77.8(5) . . ?  
N141 Zn129 S64 104.4(3) . . ?  
N123 Zn130 N144 99.8(4) . . ?  
N123 Zn130 N147 143.0(4) . . ?  
N123 Zn130 N150 102.1(4) . . ?  
N123 Zn130 N153 113.6(4) . . ?  
N144 Zn130 N147 83.2(4) . . ?  
N144 Zn130 N150 157.1(4) . . ?  
N144 Zn130 N153 82.7(4) . . ?  
N147 Zn130 N150 83.5(4) . . ?  
N147 Zn130 N153 103.4(4) . . ?  
N150 Zn130 N153 82.2(4) . . ?  
N156 Zn131 S192 110.0(3) . . ?  
N156 Zn131 N159 81.6(4) . . ?  
N156 Zn131 N162 137.0(4) . . ?  
N156 Zn131 N165 81.0(4) . . ?

N159 Zn131 S192 107.9(3) .. ?  
N159 Zn131 N162 81.5(4) .. ?  
N159 Zn131 N165 131.3(4) .. ?  
N162 Zn131 S192 112.8(3) .. ?  
N162 Zn131 N165 81.2(4) .. ?  
N165 Zn131 S192 120.7(3) .. ?  
C56 S62 Zn1 102.5(5) .. ?  
C58 S63 Zn65 100.2(5) .. ?  
C60 S64 Zn129 96.9(4) .. ?  
C184 S190 Zn3 100.0(4) .. ?  
C186 S191 Zn67 102.7(4) .. ?  
C188 S192 Zn131 101.7(4) .. ?  
C5 N4 C15 111.4(11) .. ?  
C5 N4 C40 111.6(10) .. ?  
C15 N4 C40 113.4(11) .. ?  
C5 N4 Zn1 105.1(9) .. ?  
C15 N4 Zn1 105.1(8) .. ?  
C40 N4 Zn1 109.7(8) .. ?  
C8 N7 C6 113.9(13) .. ?  
C8 N7 Zn1 111.1(10) .. ?  
C6 N7 Zn1 104.8(9) .. ?  
C11 N10 C9 118.9(14) .. ?  
C11 N10 Zn1 106.0(10) .. ?  
C9 N10 Zn1 103.3(10) .. ?  
C14 N13 C12 119.4(12) .. ?  
C14 N13 Zn1 113.1(8) .. ?  
C12 N13 Zn1 104.0(8) .. ?  
C27 N16 C47 113.0(10) .. ?  
C27 N16 C17 114.9(10) .. ?  
C47 N16 C17 112.2(9) .. ?  
C27 N16 Zn2 104.3(7) .. ?  
C47 N16 Zn2 109.7(7) .. ?  
C17 N16 Zn2 101.7(7) .. ?  
C18 N19 C20 115.6(11) .. ?  
C18 N19 Zn2 111.5(8) .. ?  
C20 N19 Zn2 111.3(9) .. ?  
C23 N22 C21 118.2(11) .. ?  
C23 N22 C48 109.3(10) .. ?  
C21 N22 C48 106.4(10) .. ?  
C23 N22 Zn2 105.9(8) .. ?  
C21 N22 Zn2 105.3(9) .. ?  
C48 N22 Zn2 111.8(7) .. ?  
C24 N25 C26 116.1(11) .. ?  
C24 N25 Zn2 110.4(9) .. ?  
C26 N25 Zn2 109.5(8) .. ?  
C55 N28 C39 113.4(10) .. ?  
C55 N28 C29 110.6(9) .. ?  
C39 N28 C29 110.9(9) .. ?  
C55 N28 Zn3 114.8(8) .. ?  
C39 N28 Zn3 101.1(7) .. ?

C29 N28 Zn3 105.5(7) .. ?  
C30 N31 C32 116.0(10) .. ?  
C30 N31 Zn3 109.5(8) .. ?  
C32 N31 Zn3 108.1(7) .. ?  
C33 N34 C35 116.8(11) .. ?  
C33 N34 Zn3 106.4(8) .. ?  
C35 N34 Zn3 106.7(8) .. ?  
C38 N37 C36 115.3(10) .. ?  
C38 N37 Zn3 111.0(8) .. ?  
C36 N37 Zn3 106.5(8) .. ?  
C56 N57 C58 117.7(13) .. ?  
C60 N59 C58 117.1(11) .. ?  
C56 N61 C60 115.9(12) .. ?  
C119 N68 C79 111.7(10) .. ?  
C119 N68 C69 107.1(10) .. ?  
C79 N68 C69 111.4(10) .. ?  
C119 N68 Zn65 113.0(7) .. ?  
C79 N68 Zn65 105.7(8) .. ?  
C69 N68 Zn65 107.9(8) .. ?  
C72 N71 C70 115.5(13) .. ?  
C72 N71 Zn65 110.0(10) .. ?  
C70 N71 Zn65 108.9(9) .. ?  
C73 N74 C75 102.8(15) .. ?  
C73 N74 Zn65 107.2(13) .. ?  
C75 N74 Zn65 104.2(11) .. ?  
C78 N77 C76 110.9(13) .. ?  
C78 N77 Zn65 113.7(10) .. ?  
C76 N77 Zn65 106.1(10) .. ?  
C81 N80 C91 114.3(11) .. ?  
C81 N80 C112 111.3(10) .. ?  
C91 N80 C112 110.3(10) .. ?  
C81 N80 Zn66 106.6(8) .. ?  
C91 N80 Zn66 105.5(7) .. ?  
C112 N80 Zn66 108.5(8) .. ?  
C84 N83 C82 116.0(11) .. ?  
C84 N83 Zn66 110.5(9) .. ?  
C82 N83 Zn66 109.1(7) .. ?  
C85 N86 C111 112.2(12) .. ?  
C85 N86 C87 115.4(12) .. ?  
C111 N86 C87 108.7(11) .. ?  
C85 N86 Zn66 107.6(10) .. ?  
C111 N86 Zn66 108.2(8) .. ?  
C87 N86 Zn66 104.3(8) .. ?  
C88 N89 C90 114.0(12) .. ?  
C88 N89 Zn66 113.0(9) .. ?  
C90 N89 Zn66 108.4(9) .. ?  
C103 N92 C104 115.5(18) .. ?  
C103 N92 C93 115.5(19) .. ?  
C104 N92 C93 106.9(11) .. ?  
C103 N92 Zn67 104.6(16) .. ?

C104 N92 Zn67 114.9(9) . . ?  
C93 N92 Zn67 98.5(8) . . ?  
C94 N95 C96 115.0(14) . . ?  
C94 N95 Zn67 118.0(12) . . ?  
C96 N95 Zn67 102.0(8) . . ?  
C97 N98 C99 116.0(15) . . ?  
C97 N98 Zn67 111.7(11) . . ?  
C99 N98 Zn67 99.9(10) . . ?  
C100 N101 C102 121.1(15) . . ?  
C100 N101 Zn67 110.3(12) . . ?  
C102 N101 Zn67 104.5(9) . . ?  
C120 N121 C122 123.3(9) . . ?  
C120 N121 Zn2 112.1(7) . . ?  
C122 N121 Zn2 124.6(7) . . ?  
C122 N123 C124 116.7(9) . . ?  
C122 N123 Zn130 112.1(7) . . ?  
C124 N123 Zn130 131.1(8) . . ?  
C124 N125 C120 119.5(10) . . ?  
C124 N125 Zn66 109.9(8) . . ?  
C120 N125 Zn66 130.5(7) . . ?  
C143 N132 C168 112.3(13) . . ?  
C143 N132 C133 111.6(12) . . ?  
C168 N132 C133 110.2(12) . . ?  
C143 N132 Zn129 106.3(10) . . ?  
C168 N132 Zn129 112.3(9) . . ?  
C133 N132 Zn129 103.8(8) . . ?  
C134 N135 C136 111.8(13) . . ?  
C134 N135 Zn129 114.8(12) . . ?  
C136 N135 Zn129 105.3(9) . . ?  
C137 N138 C139 118.0(14) . . ?  
C137 N138 Zn129 103.8(11) . . ?  
C139 N138 Zn129 107.6(9) . . ?  
C140 N141 C142 112.3(9) . . ?  
C140 N141 Zn129 113.9(10) . . ?  
C142 N141 Zn129 104.9(8) . . ?  
C145 N144 C155 113.3(10) . . ?  
C145 N144 C175 111.2(10) . . ?  
C155 N144 C175 110.6(10) . . ?  
C145 N144 Zn130 105.6(8) . . ?  
C155 N144 Zn130 106.7(7) . . ?  
C175 N144 Zn130 109.2(7) . . ?  
C146 N147 C148 116.0(10) . . ?  
C146 N147 Zn130 108.2(8) . . ?  
C148 N147 Zn130 111.6(8) . . ?  
C151 N150 C176 112.2(11) . . ?  
C151 N150 C149 115.9(11) . . ?  
C176 N150 C149 105.0(10) . . ?  
C151 N150 Zn130 109.0(8) . . ?  
C176 N150 Zn130 109.9(7) . . ?  
C149 N150 Zn130 104.4(8) . . ?



C152 N153 C154 115.6(10) .. ?  
C152 N153 Zn130 108.3(8) .. ?  
C154 N153 Zn130 111.3(7) .. ?  
C167 N156 C157 113.7(9) .. ?  
C167 N156 C183 112.4(9) .. ?  
C157 N156 C183 109.7(9) .. ?  
C167 N156 Zn131 103.8(7) .. ?  
C157 N156 Zn131 104.6(7) .. ?  
C183 N156 Zn131 112.4(7) .. ?  
C158 N159 C160 115.0(9) .. ?  
C158 N159 Zn131 107.3(7) .. ?  
C160 N159 Zn131 107.9(7) .. ?  
C161 N162 C163 112.8(9) .. ?  
C161 N162 Zn131 106.4(7) .. ?  
C163 N162 Zn131 106.9(7) .. ?  
C166 N165 C164 117.5(10) .. ?  
C166 N165 Zn131 107.8(7) .. ?  
C164 N165 Zn131 108.8(8) .. ?  
C184 N185 C186 115.8(10) .. ?  
C186 N187 C188 115.3(10) .. ?  
C188 N189 C184 115.3(10) .. ?  
O204 N201 O203 111.3(12) .. ?  
O204 N201 O202 123.2(13) .. ?  
O203 N201 O202 124.7(13) .. ?  
O208 N205 O207 121.7(11) .. ?  
O208 N205 O206 124.9(11) .. ?  
O207 N205 O206 113.4(12) .. ?  
O210 N209 O212 115.0(11) .. ?  
O210 N209 O211 119.3(9) .. ?  
O212 N209 O211 124.1(10) .. ?  
O215 N213 O214 125.7(8) .. ?  
O215 N213 O216 116.3(8) .. ?  
O214 N213 O216 117.9(9) .. ?  
O219 N217 O220 121.5(14) .. ?  
O219 N217 O218 117.8(15) .. ?  
O220 N217 O218 120.6(17) .. ?  
N4 C5 C6 113.2(12) .. ?  
N7 C6 C5 107.2(12) .. ?  
C9 C8 N7 112.2(16) .. ?  
C8 C9 N10 114.8(17) .. ?  
C12 C11 N10 112.2(14) .. ?  
C11 C12 N13 116.7(14) .. ?  
N13 C14 C15 108.8(12) .. ?  
N4 C15 C14 110.2(12) .. ?  
C18 C17 N16 116.1(11) .. ?  
N19 C18 C17 109.5(11) .. ?  
N19 C20 C21 105.6(13) .. ?  
N22 C21 C20 112.0(14) .. ?  
N22 C23 C24 113.3(12) .. ?  
N25 C24 C23 111.2(12) .. ?

N25 C26 C27 106.8(11) .. ?  
N16 C27 C26 114.7(11) .. ?  
C30 C29 N28 108.3(10) .. ?  
N31 C30 C29 113.3(11) .. ?  
C33 C32 N31 110.6(12) .. ?  
C32 C33 N34 109.0(12) .. ?  
C36 C35 N34 106.4(11) .. ?  
N37 C36 C35 111.0(11) .. ?  
N37 C38 C39 111.2(11) .. ?  
N28 C39 C38 110.3(9) .. ?  
C41 C40 N4 114.8(11) .. ?  
C42 C41 C46 113.0(11) .. ?  
C42 C41 C40 122.7(11) .. ?  
C46 C41 C40 124.4(12) .. ?  
C43 C42 C41 125.2(11) .. ?  
C42 C43 C44 121.2(11) .. ?  
C43 C44 C45 116.0(11) .. ?  
C43 C44 C47 122.3(11) .. ?  
C45 C44 C47 121.6(12) .. ?  
C46 C45 C44 123.2(11) .. ?  
C45 C46 C41 121.2(12) .. ?  
N16 C47 C44 117.7(9) .. ?  
C49 C48 N22 119.4(10) .. ?  
C50 C49 C48 122.7(10) .. ?  
C50 C49 C54 113.5(11) .. ?  
C48 C49 C54 123.7(11) .. ?  
C51 C50 C49 121.5(11) .. ?  
C50 C51 C52 123.8(11) .. ?  
C53 C52 C51 114.2(11) .. ?  
C53 C52 C55 123.8(11) .. ?  
C51 C52 C55 121.8(10) .. ?  
C54 C53 C52 123.9(12) .. ?  
C53 C54 C49 122.9(12) .. ?  
N28 C55 C52 118.6(11) .. ?  
N57 C56 N61 124.2(12) .. ?  
N57 C56 S62 114.9(11) .. ?  
N61 C56 S62 120.7(10) .. ?  
N57 C58 N59 122.0(14) .. ?  
N57 C58 S63 120.9(13) .. ?  
N59 C58 S63 116.9(10) .. ?  
N59 C60 N61 122.8(12) .. ?  
N59 C60 S64 120.5(9) .. ?  
N61 C60 S64 116.6(11) .. ?  
N68 C69 C70 109.6(12) .. ?  
N71 C70 C69 108.3(12) .. ?  
N71 C72 C73 106.0(15) .. ?  
N74 C73 C72 100.9(17) .. ?  
C76 C75 N74 112.8(15) .. ?  
C75 C76 N77 108.9(16) .. ?  
N77 C78 C79 109.4(14) .. ?

C78 C79 N68 106.9(12) .. ?  
N80 C81 C82 111.9(12) .. ?  
C81 C82 N83 109.4(12) .. ?  
N83 C84 C85 108.8(13) .. ?  
N86 C85 C84 113.0(14) .. ?  
C88 C87 N86 111.0(12) .. ?  
N89 C88 C87 107.1(13) .. ?  
N89 C90 C91 110.6(13) .. ?  
N80 C91 C90 113.8(11) .. ?  
C94 C93 N92 116.0(15) .. ?  
N95 C94 C93 104.5(18) .. ?  
C97 C96 N95 111.1(15) .. ?  
C96 C97 N98 108.3(18) .. ?  
C100 C99 N98 116(2) .. ?  
C99 C100 N101 104(2) .. ?  
C103 C102 N101 109.5(19) .. ?  
N92 C103 C102 118(3) .. ?  
N92 C104 C105 116.6(11) .. ?  
C110 C105 C106 115.9(14) .. ?  
C110 C105 C104 128.3(15) .. ?  
C106 C105 C104 115.8(12) .. ?  
C107 C106 C105 119.8(13) .. ?  
C106 C107 C108 119.0(15) .. ?  
C109 C108 C107 120.2(14) .. ?  
C109 C108 C111 124.2(13) .. ?  
C107 C108 C111 115.4(15) .. ?  
C108 C109 C110 121.6(14) .. ?  
C109 C110 C105 123.4(16) .. ?  
N86 C111 C108 117.9(10) .. ?  
C113 C112 N80 115.1(12) .. ?  
C114 C113 C118 115.6(14) .. ?  
C114 C113 C112 122.3(13) .. ?  
C118 C113 C112 121.7(13) .. ?  
C115 C114 C113 122.5(13) .. ?  
C114 C115 C116 122.2(13) .. ?  
C115 C116 C117 115.9(13) .. ?  
C115 C116 C119 121.3(12) .. ?  
C117 C116 C119 122.4(12) .. ?  
C118 C117 C116 119.8(14) .. ?  
C117 C118 C113 122.8(13) .. ?  
C116 C119 N68 114.1(11) .. ?  
N121 C120 N125 117.6(9) .. ?  
N121 C120 S126 119.5(9) .. ?  
N125 C120 S126 122.9(9) .. ?  
N121 C122 N123 120.0(9) .. ?  
N121 C122 S127 124.5(8) .. ?  
N123 C122 S127 115.3(8) .. ?  
N125 C124 N123 122.8(11) .. ?  
N125 C124 S128 117.0(9) .. ?  
N123 C124 S128 120.3(8) .. ?

C134 C133 N132 109.3(12) .. ?  
N135 C134 C133 103.4(15) .. ?  
C137 C136 N135 106.1(14) .. ?  
N138 C137 C136 111.6(17) .. ?  
N138 C139 C140 113.3(12) .. ?  
N141 C140 C139 102.5(10) .. ?  
C143 C142 N141 109.7(14) .. ?  
C142 C143 N132 108.2(15) .. ?  
N144 C145 C146 115.0(11) .. ?  
N147 C146 C145 110.3(10) .. ?  
N147 C148 C149 106.2(11) .. ?  
N150 C149 C148 112.0(11) .. ?  
N150 C151 C152 111.1(12) .. ?  
N153 C152 C151 110.5(11) .. ?  
N153 C154 C155 110.9(11) .. ?  
N144 C155 C154 112.4(11) .. ?  
C158 C157 N156 111.1(10) .. ?  
C157 C158 N159 109.1(10) .. ?  
C161 C160 N159 112.8(10) .. ?  
N162 C161 C160 108.3(10) .. ?  
C164 C163 N162 110.8(11) .. ?  
C163 C164 N165 109.7(11) .. ?  
N165 C166 C167 114.0(11) .. ?  
N156 C167 C166 108.6(10) .. ?  
N132 C168 C169 117.9(11) .. ?  
C174 C169 C170 117.4(14) .. ?  
C174 C169 C168 125.9(14) .. ?  
C170 C169 C168 116.6(15) .. ?  
C169 C170 C171 121.1(17) .. ?  
C172 C171 C170 118.2(17) .. ?  
C171 C172 C173 118.1(13) .. ?  
C171 C172 C175 118.7(15) .. ?  
C173 C172 C175 122.3(15) .. ?  
C174 C173 C172 120.3(15) .. ?  
C169 C174 C173 124.5(15) .. ?  
C172 C175 N144 115.5(10) .. ?  
N150 C176 C177 119.6(9) .. ?  
C182 C177 C178 119.6(13) .. ?  
C182 C177 C176 118.9(13) .. ?  
C178 C177 C176 121.3(14) .. ?  
C177 C178 C179 121.9(15) .. ?  
C180 C179 C178 121.6(14) .. ?  
C179 C180 C181 117.6(12) .. ?  
C179 C180 C183 122.6(12) .. ?  
C181 C180 C183 119.7(12) .. ?  
C180 C181 C182 122.3(13) .. ?  
C177 C182 C181 116.9(13) .. ?  
C180 C183 N156 115.9(9) .. ?  
N185 C184 N189 122.8(10) .. ?  
N185 C184 S190 118.3(8) .. ?

N189 C184 S190 118.8(9) . . ?  
 N187 C186 N185 124.9(12) . . ?  
 N187 C186 S191 117.1(9) . . ?  
 N185 C186 S191 118.1(10) . . ?  
 N189 C188 N187 125.8(11) . . ?  
 N189 C188 S192 113.9(10) . . ?  
 N187 C188 S192 120.3(8) . . ?  
 #-----  
 loop\_  
 \_geom\_contact\_atom\_site\_label\_1  
 \_geom\_contact\_atom\_site\_label\_2  
 \_geom\_contact\_distance  
 \_geom\_contact\_site\_symmetry\_1  
 \_geom\_contact\_site\_symmetry\_2  
 \_geom\_contact\_publ\_flag  
 S63 O214 3.27(1) . 2\_666 ?  
 S64 O211 3.191(9) . 1\_554 ?  
 O1W N89 2.98(2) . 2\_666 ?  
 O2W O6W 2.90(2) . 1\_655 ?  
 O7W O218 2.97(2) . 1\_455 ?  
 O7W O22W 3.01(4) . 1\_455 ?  
 O10W O215 2.76(2) . 2\_666 ?  
 O10W O24W 3.02(4) . 2\_666 ?  
 O14W N25 3.13(2) . 1\_455 ?  
 O15W O207 3.22(3) . 1\_554 ?  
 O18W O212 2.74(2) . 1\_554 ?  
 O19W O220 2.96(2) . 2\_656 ?  
 O19W C9 3.22(3) . 1\_455 ?  
 O21W O21W 2.85(4) . 2\_656 ?  
 O21W C18 3.20(2) . 2\_656 ?  
 O25W C35 3.14(4) . 1\_554 ?  
 O202 C69 3.23(2) . 1\_455 ?  
 O208 C140 3.18(1) . 1\_556 ?  
 O210 N159 2.87(2) . 2\_657 ?  
 O211 N141 3.00(1) . 1\_556 ?  
 O214 N77 3.20(1) . 2\_666 ?  
 O216 N98 2.95(2) . 2\_667 ?  
 #-----  
 #-----
