# Supplementary material
Source: PubMed Central journal article supplement (PMC122690)

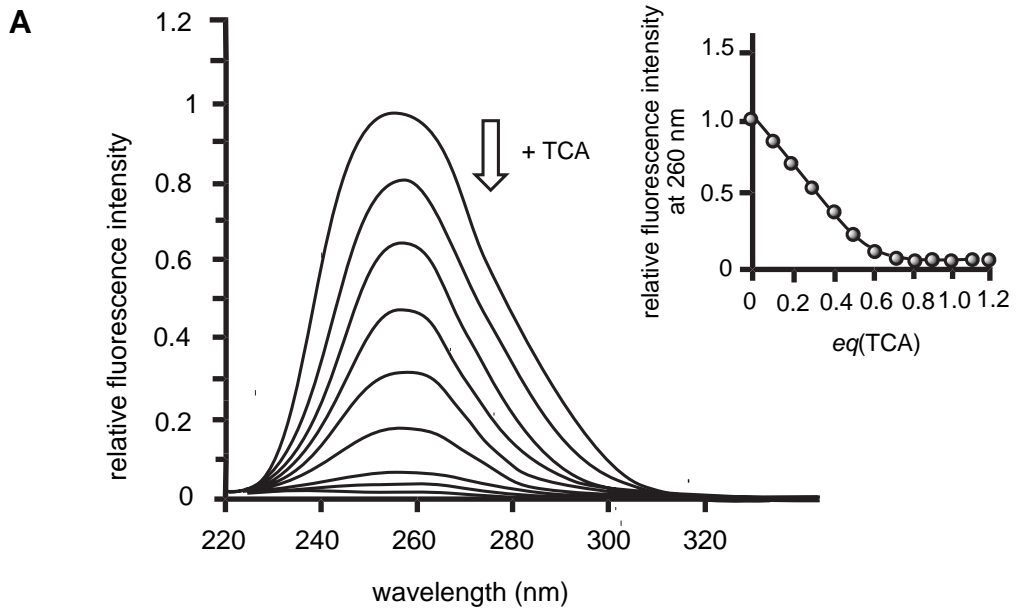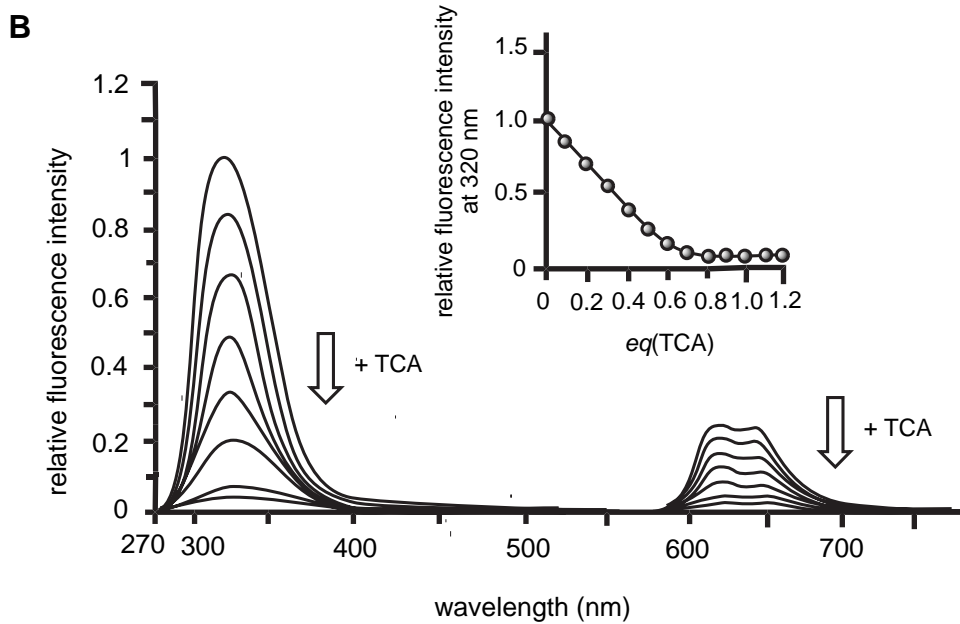

Supplement: pnas_99_8_4894__10.pdf [file pnas_99_8_4894__10.pdf]

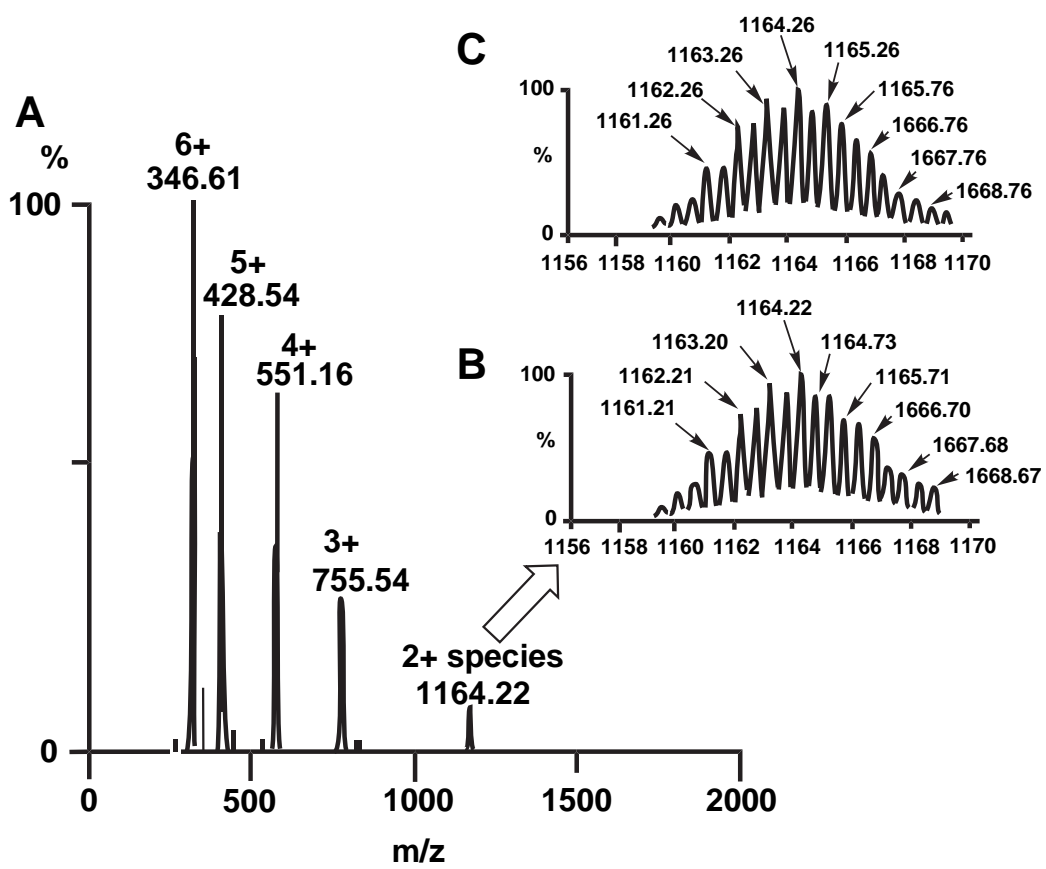

Supplement: pnas_99_8_4894__11.pdf [file pnas_99_8_4894__11.pdf]

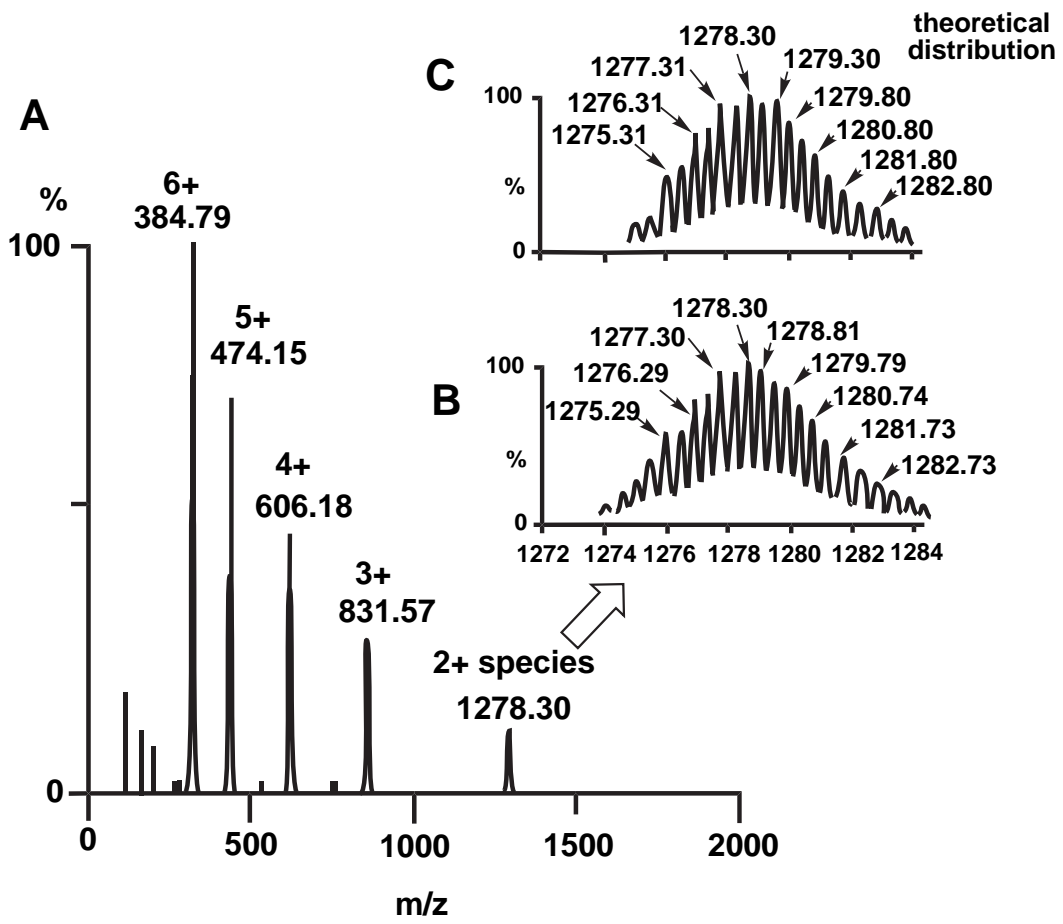

Supplement: pnas_99_8_4894__12.pdf [file pnas_99_8_4894__12.pdf]

**A**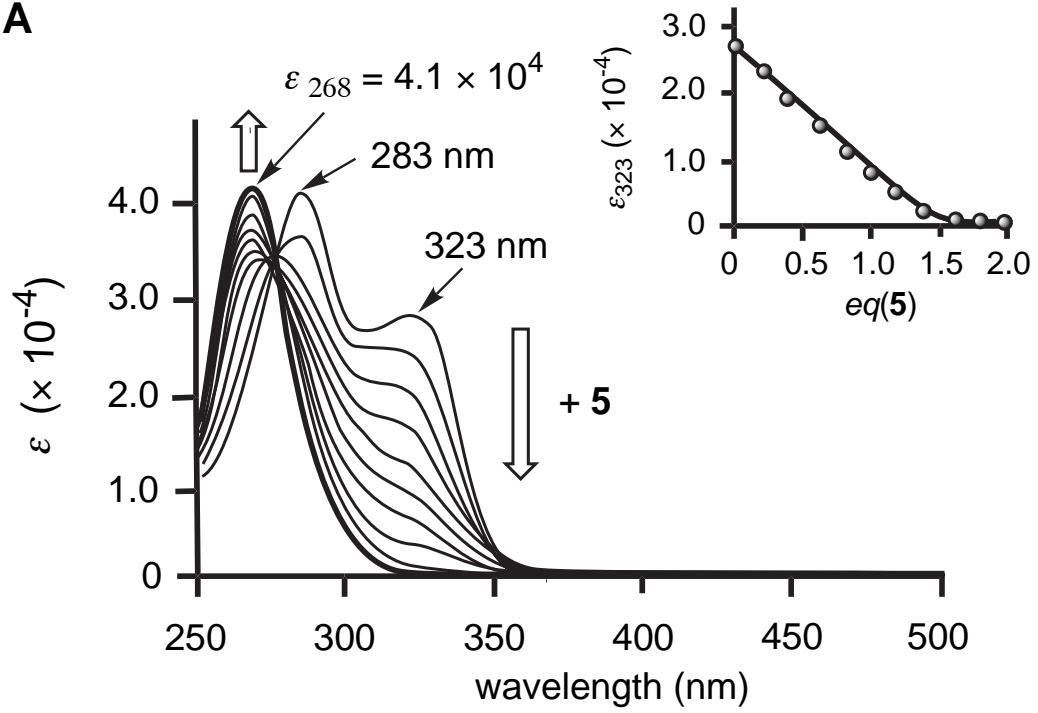**B**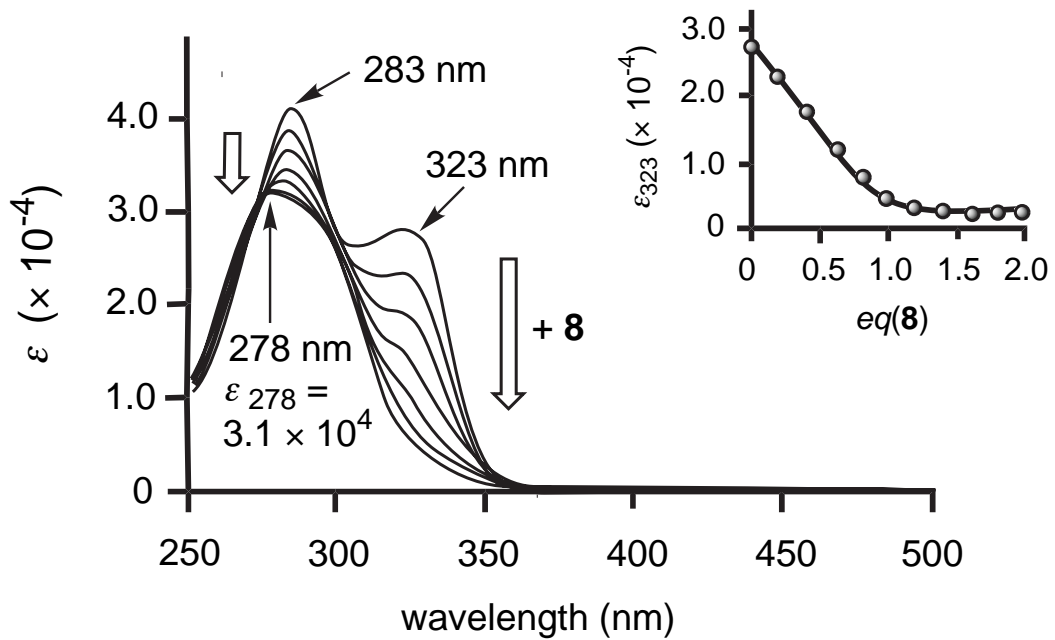

Supplement: pnas_99_8_4894__8.pdf [file pnas_99_8_4894__8.pdf]

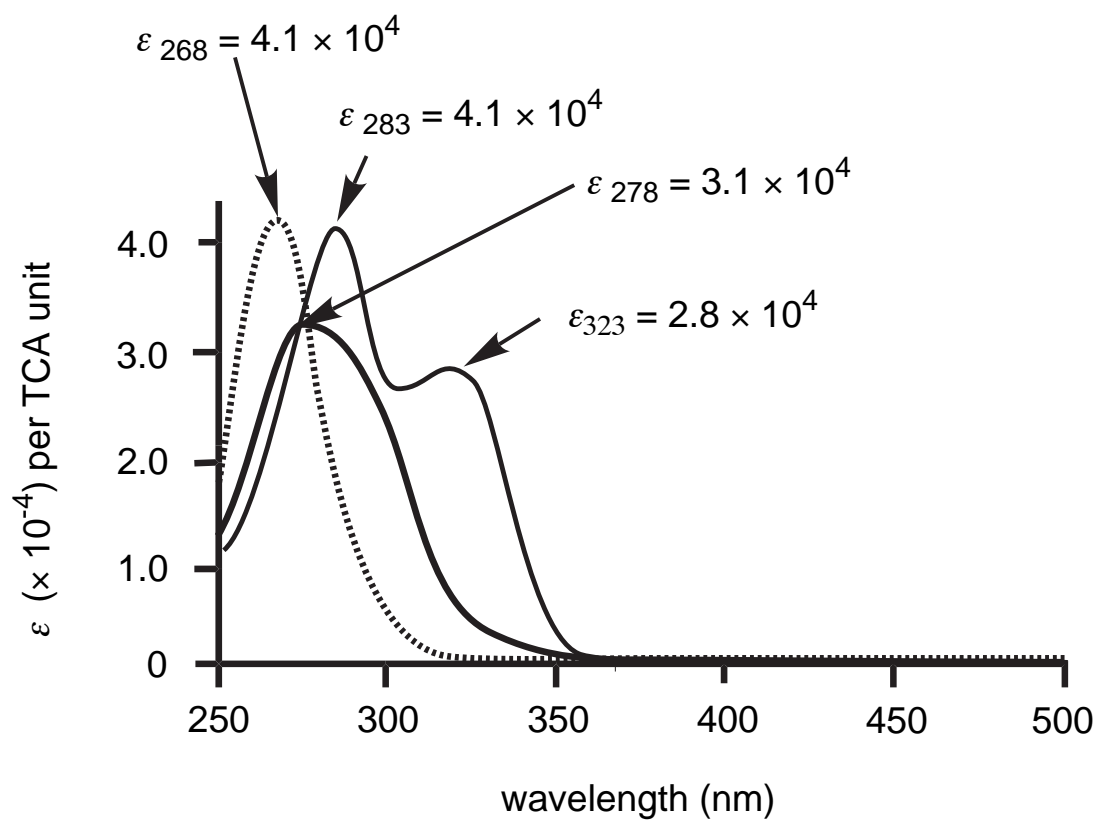

Supplement: pnas_99_8_4894__9.pdf [file pnas_99_8_4894__9.pdf]
